# Supplementary material for: Synthesis of dimeric analogs of adenophostin A that potently evoke Ca2+release through IP3receptors
Source: Royal Society of Chemistry journal article supplement (doi:10.1039/c6ra19413c), 2016-01-01

Electronic Supplementary Information

## Synthesis of Dimeric Analogs of Adenophostin A that Potently Evoke $\text{Ca}^{2+}$ Release through $\text{IP}_3$ Receptors

Amol M. Vibhute,<sup>a</sup> Poornenth Pushpanandan,<sup>a</sup> Maria Varghese,<sup>a</sup> Vera Konieczny,<sup>b</sup> Colin W. Taylor<sup>b</sup> and Kana M. Sureshan<sup>a\*</sup>

<sup>a</sup>*School of Chemistry, Indian Institute of Science Education and Research Thiruvananthapuram, KERALA-695016, India. E-mail: [kms@iisertvm.ac.in](mailto:kms@iisertvm.ac.in) Home page: <http://kms514.wix.com/kmsgroup>*

<sup>b</sup>*Department of Pharmacology, Tennis Court Road, University of Cambridge, Cambridge, CB2, 1PD, UK.*

### Index

|                                           |          |
|-------------------------------------------|----------|
| 1. NMR data of protected dimer <b>15a</b> | S2- S7   |
| 2. NMR data of protected dimer <b>15b</b> | S8- S13  |
| 3. NMR data of protected dimer <b>15c</b> | S14- S19 |
| 4. NMR data of protected dimer <b>15d</b> | S20- S25 |
| 5. NMR data of dimer <b>12a</b>           | S26- S30 |
| 6. NMR data of dimer <b>12b</b>           | S31- S35 |
| 7. NMR data of dimer <b>12c</b>           | S36- S40 |
| 8. NMR data of dimer <b>12d</b>           | S41- S46 |

Electronic Supplementary Information

<sup>1</sup>H NMR of 15a in CDCl<sub>3</sub>

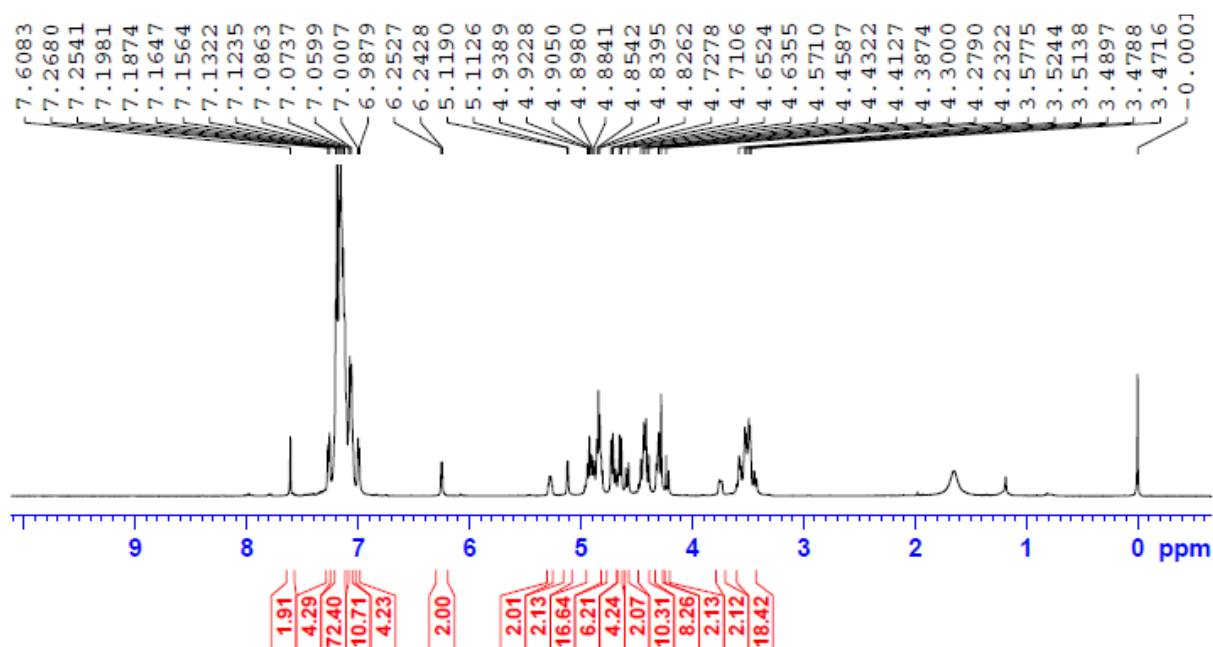

zoom

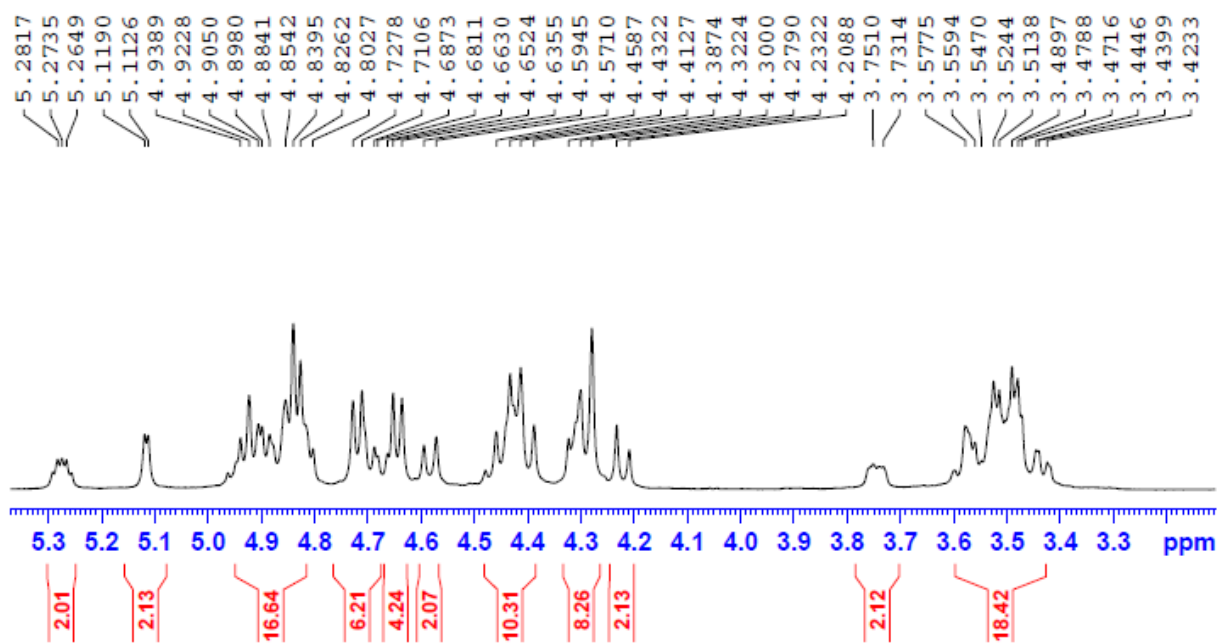

# COSY NMR of 15a in CDCl<sub>3</sub>

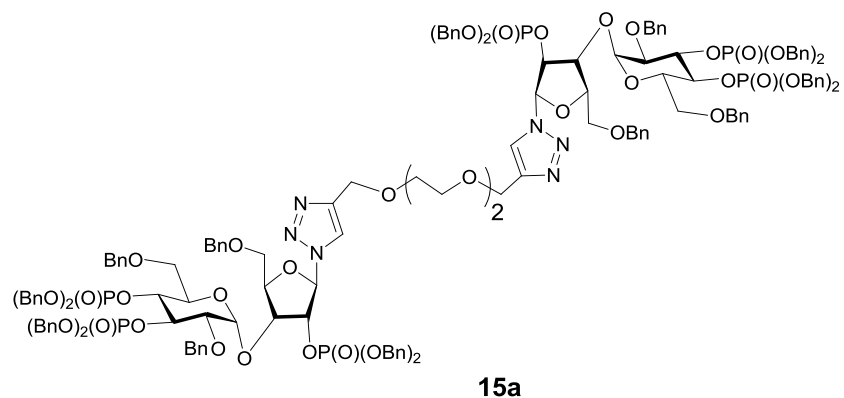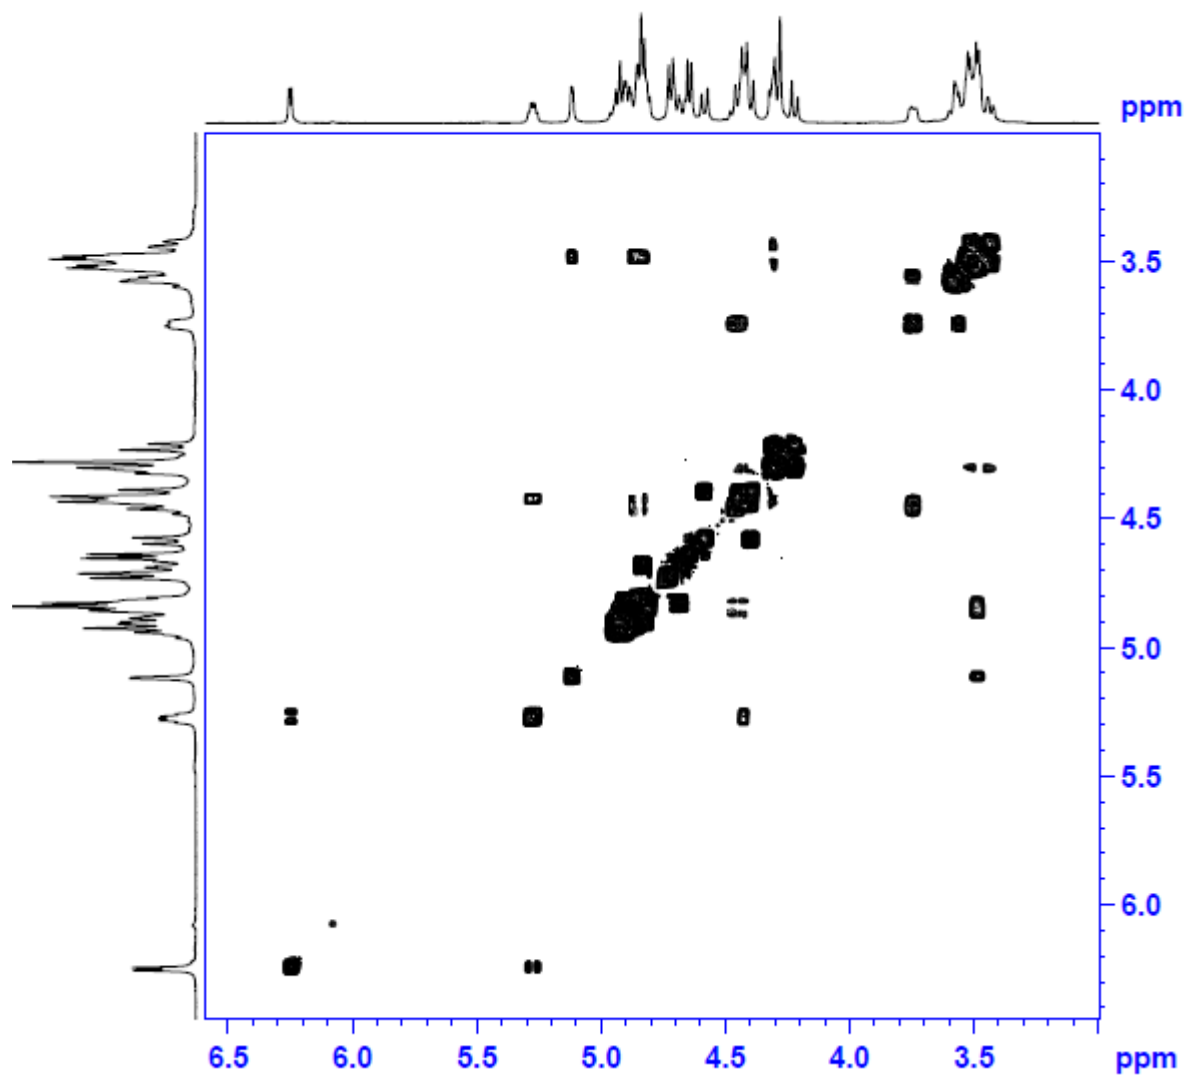

Electronic Supplementary Information

**$^{13}\text{C}$  NMR of 15a in  $\text{CDCl}_3$**

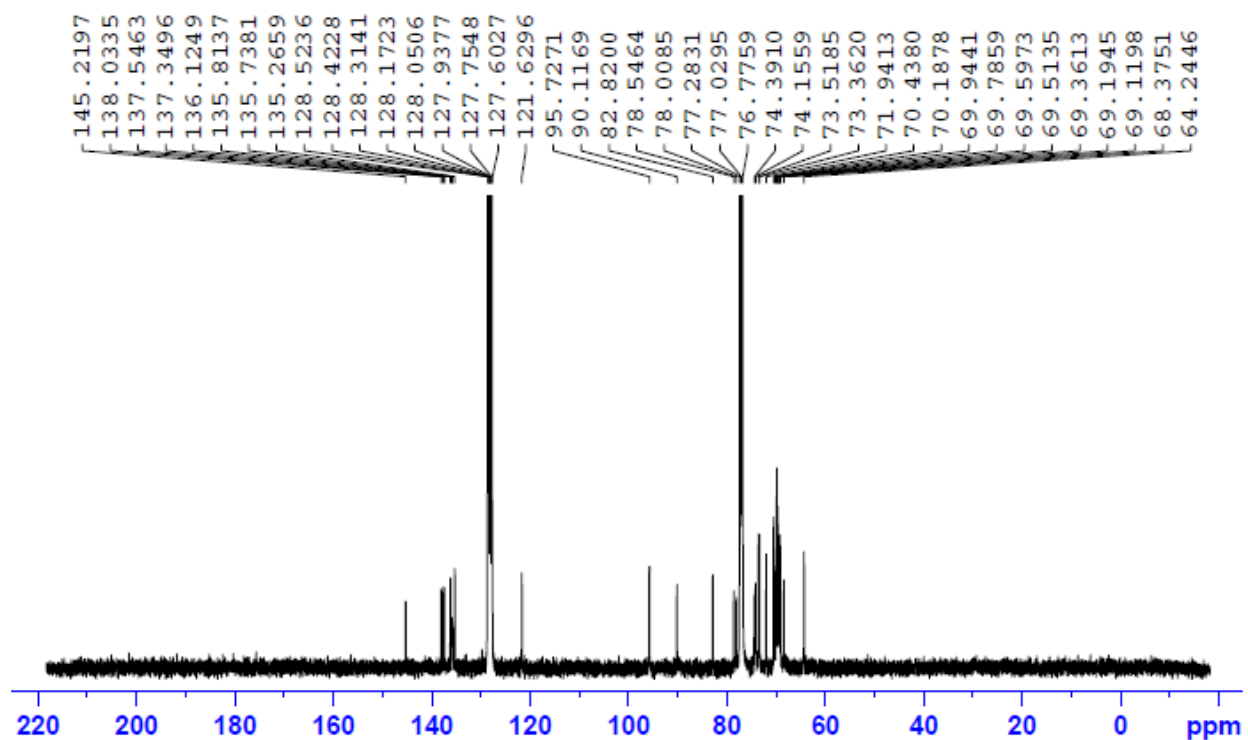

zoom

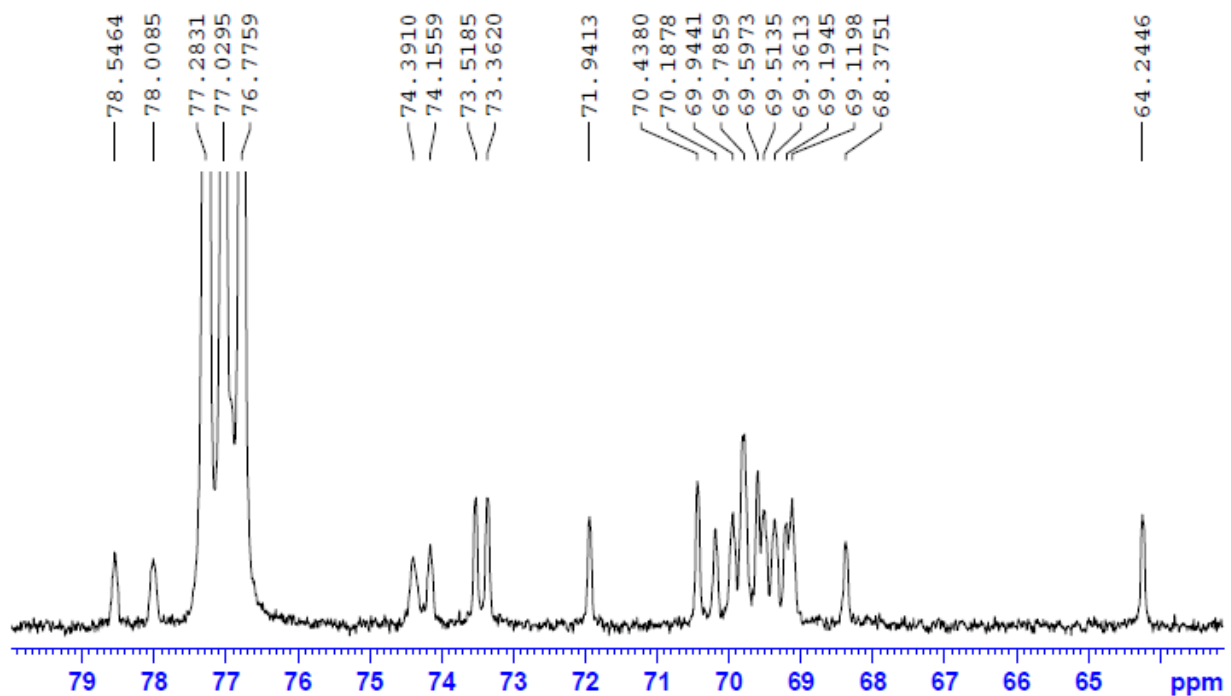

**DEPT NMR of 15a in CDCl<sub>3</sub>**

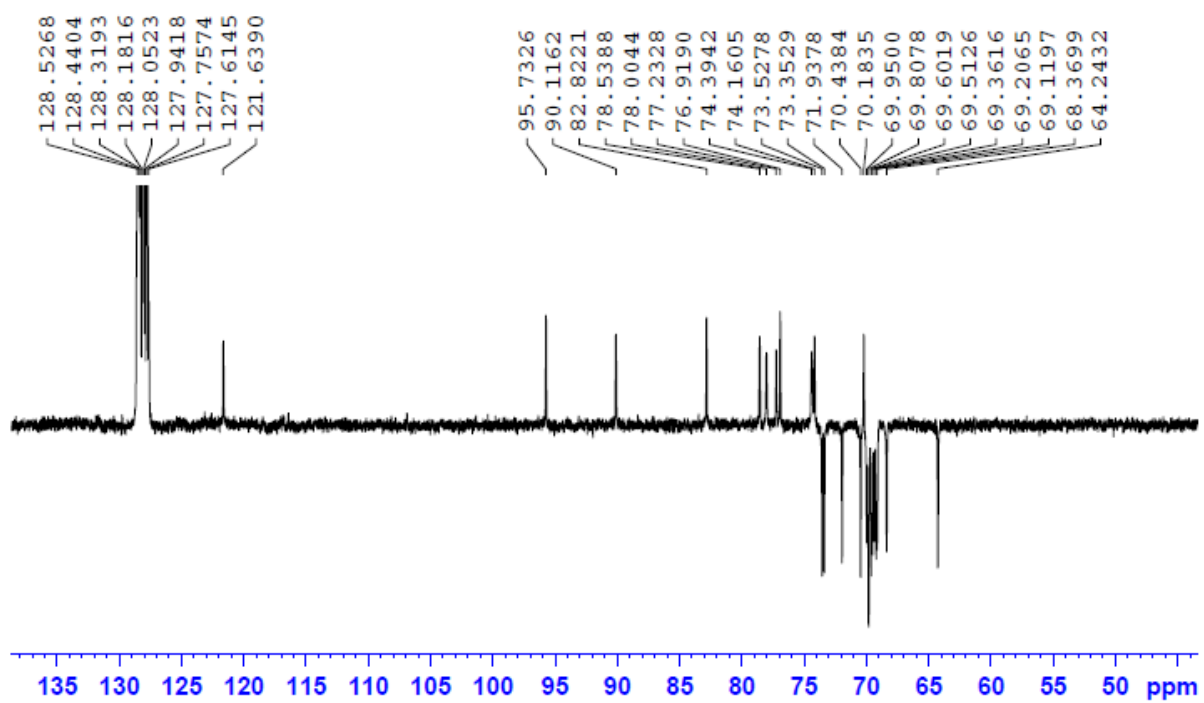

**<sup>31</sup>P NMR of 15a in CDCl<sub>3</sub>**

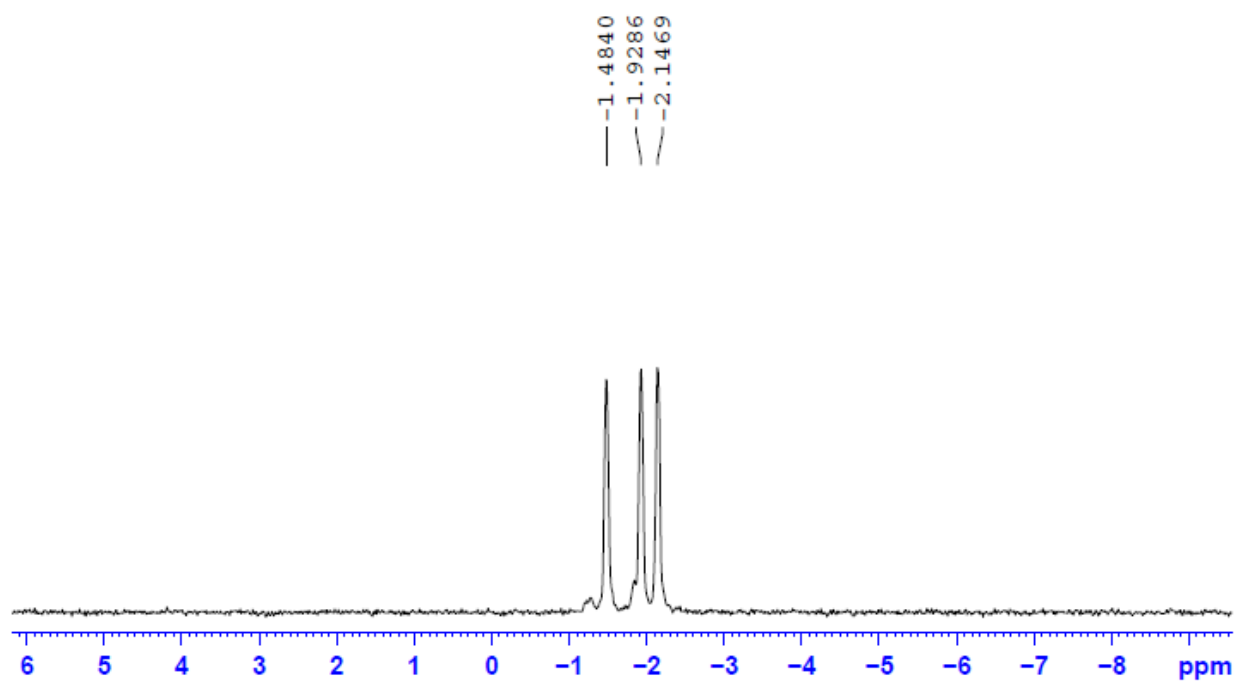

HMBC NMR of 15a in CDCl<sub>3</sub>

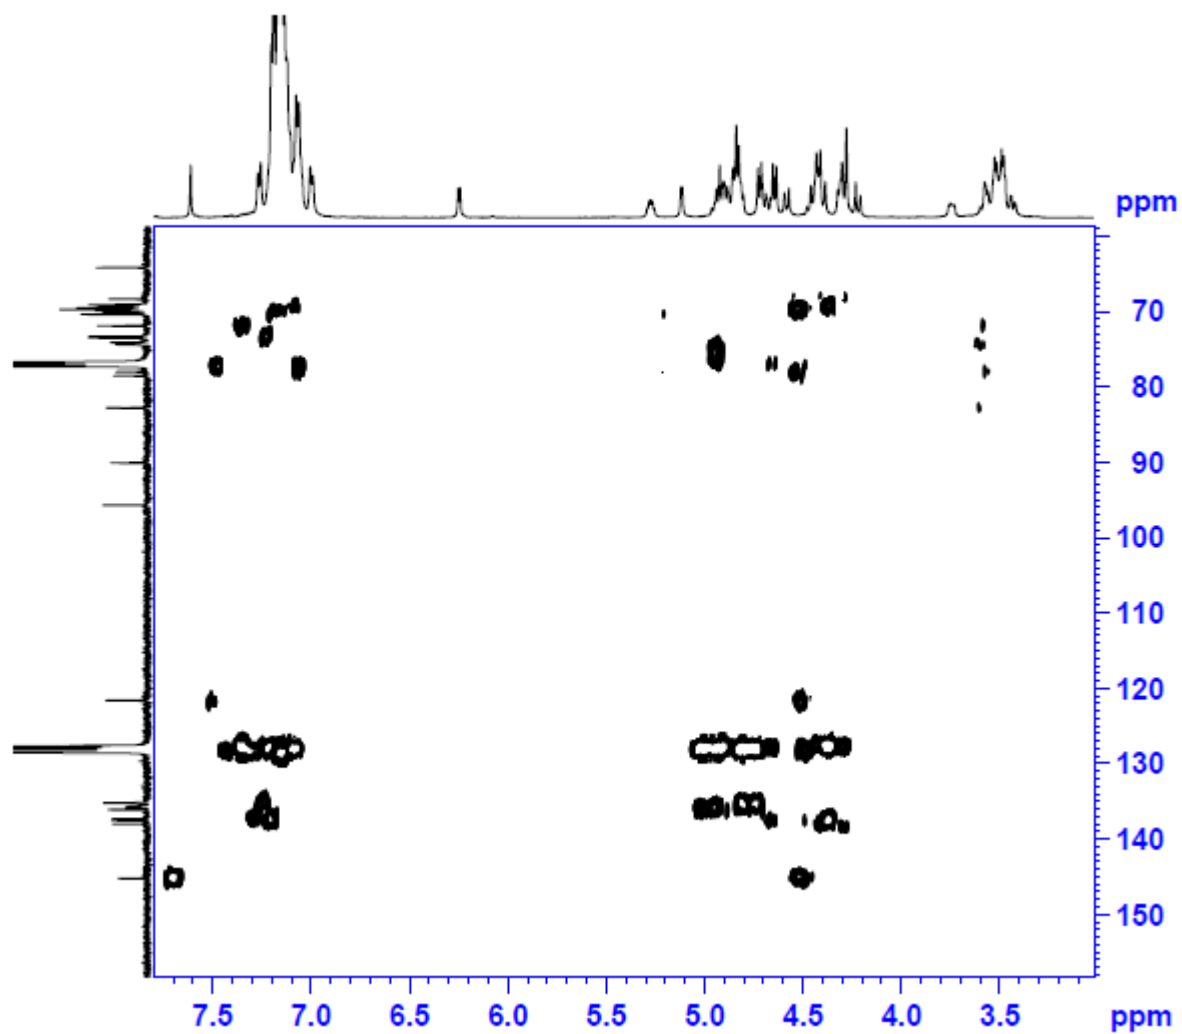

**HMQC NMR of 15a in CDCl<sub>3</sub>**

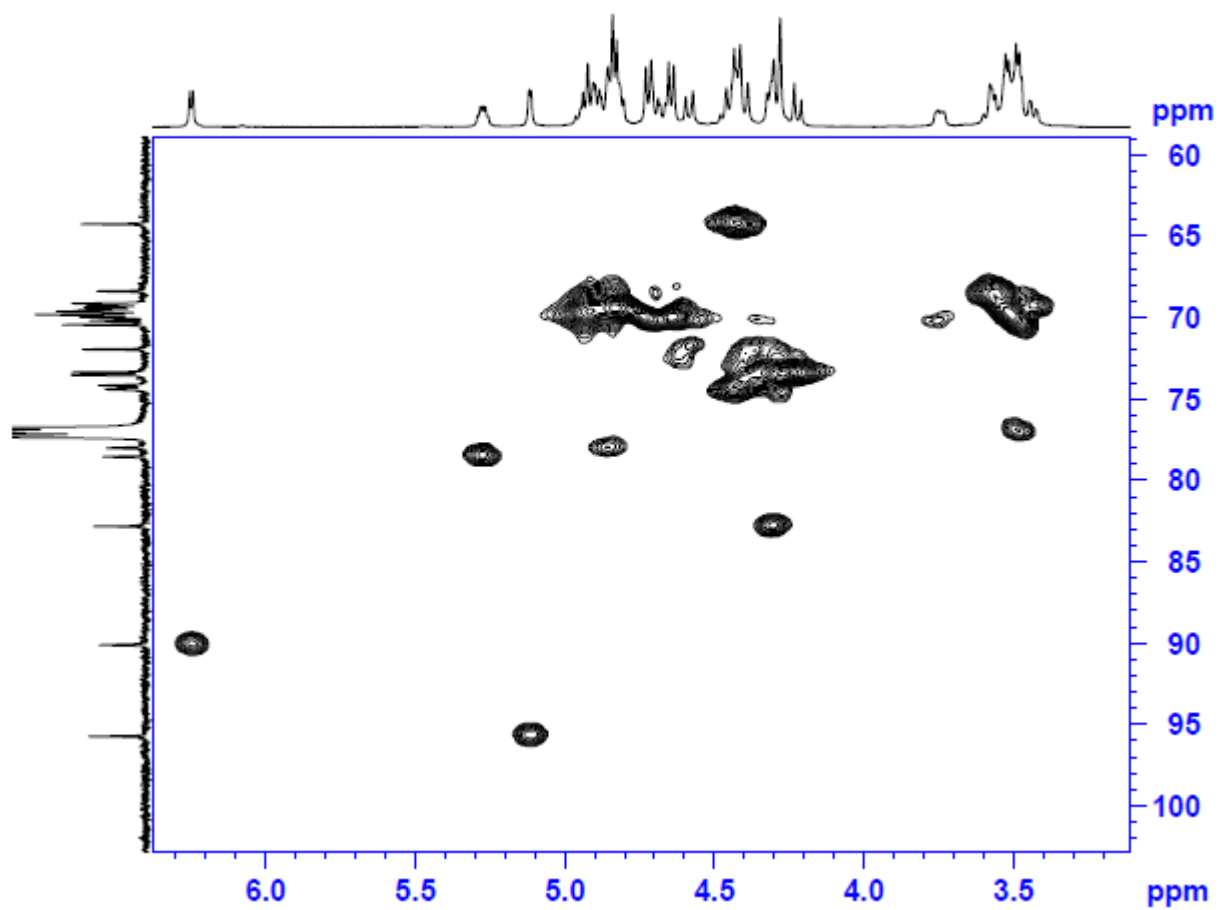

Electronic Supplementary Information

**$^1\text{H}$  NMR of 15b in  $\text{CDCl}_3$**

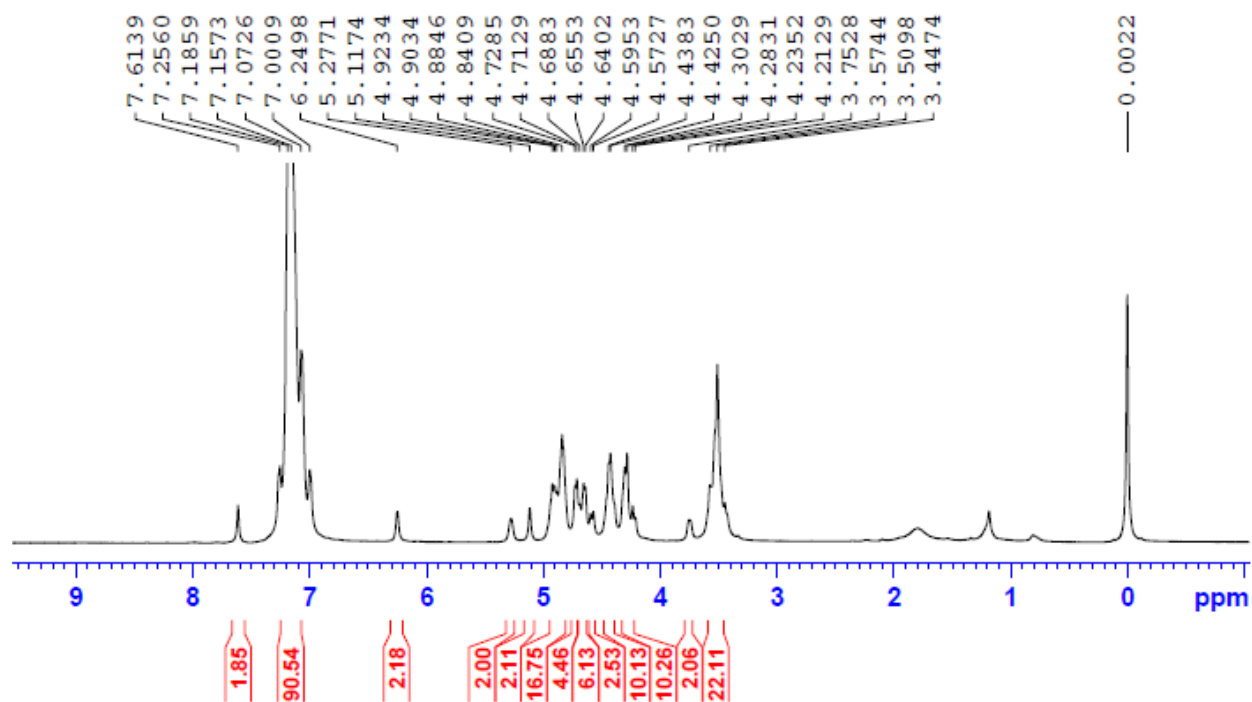

zoom

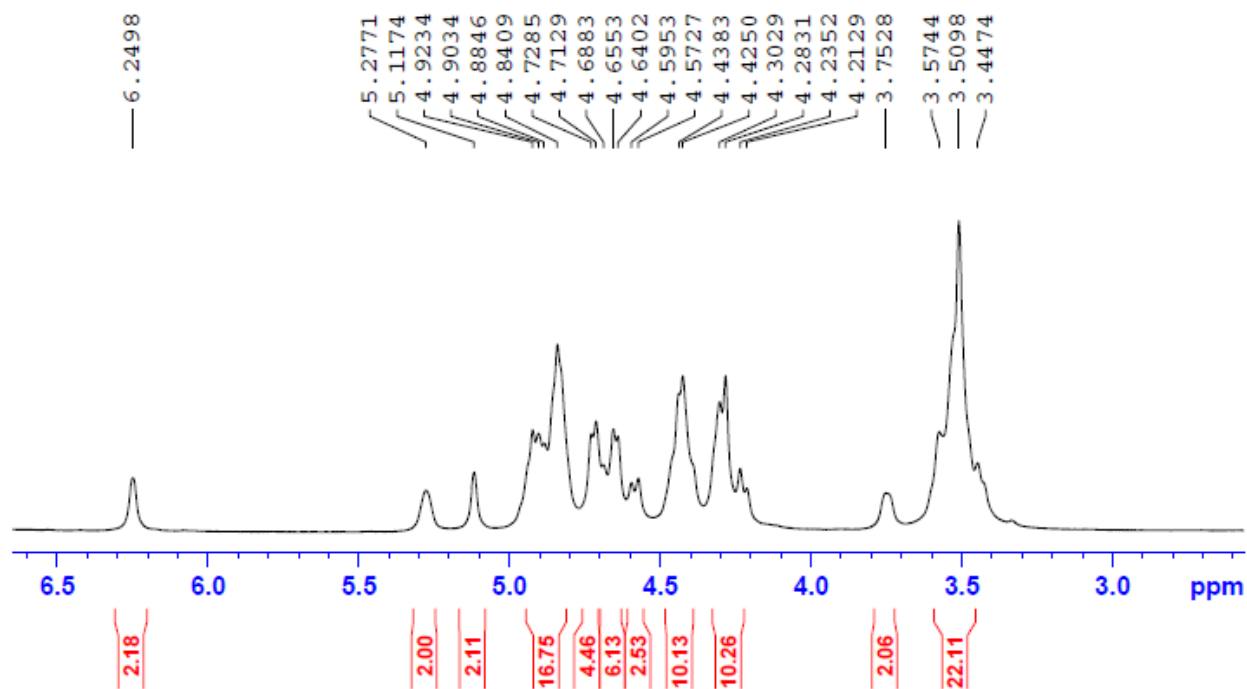



**COSY NMR of 15b in CDCl<sub>3</sub>**

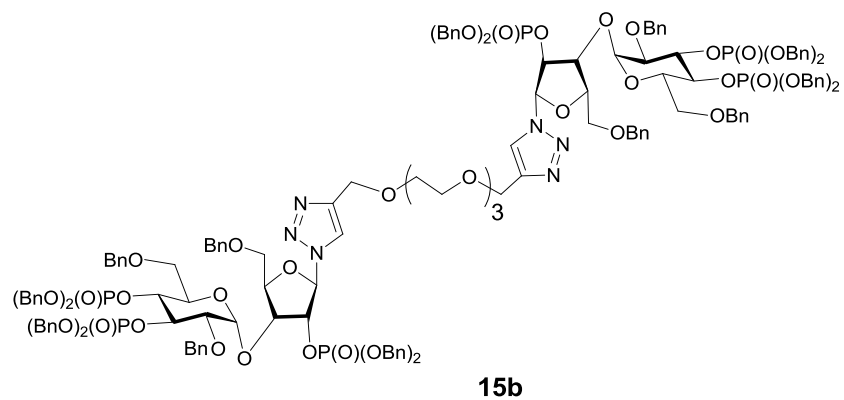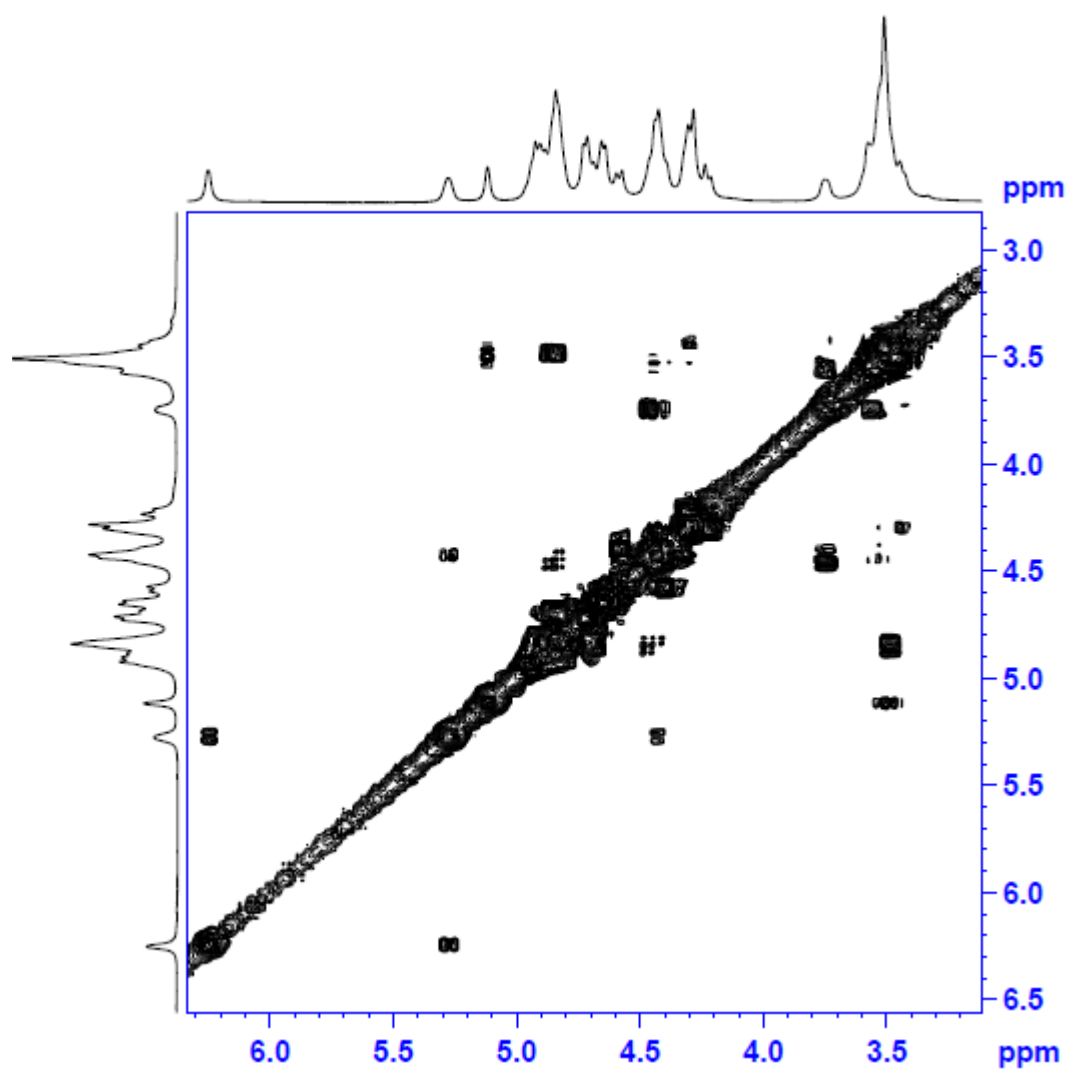

Electronic Supplementary Information

**$^{13}\text{C}$  NMR of 15b in  $\text{CDCl}_3$**

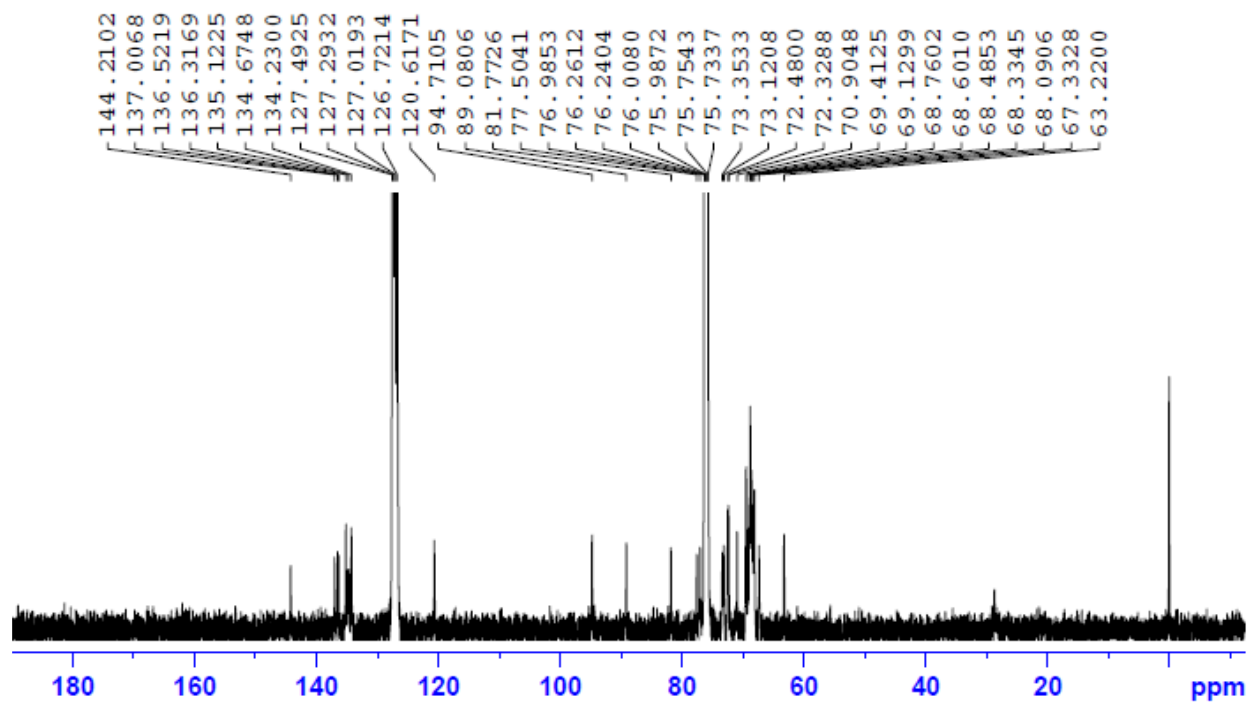

zoom

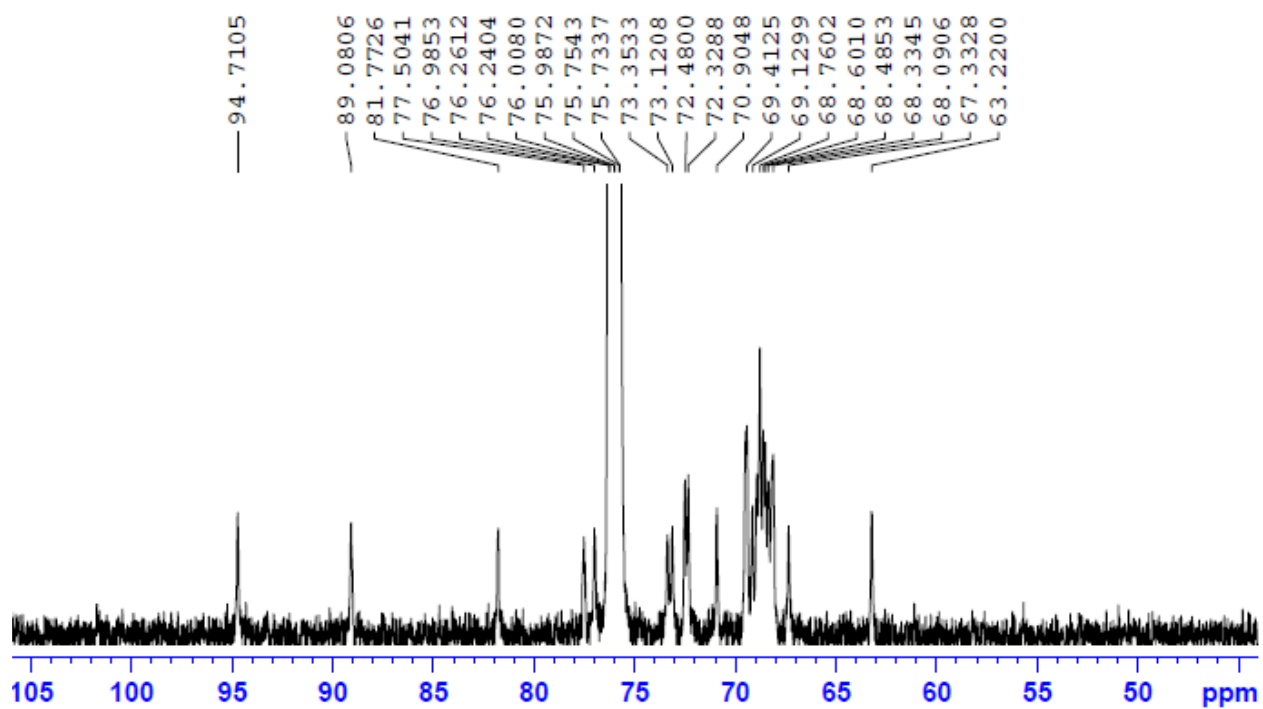

**DEPT NMR of 15b in CDCl<sub>3</sub>**

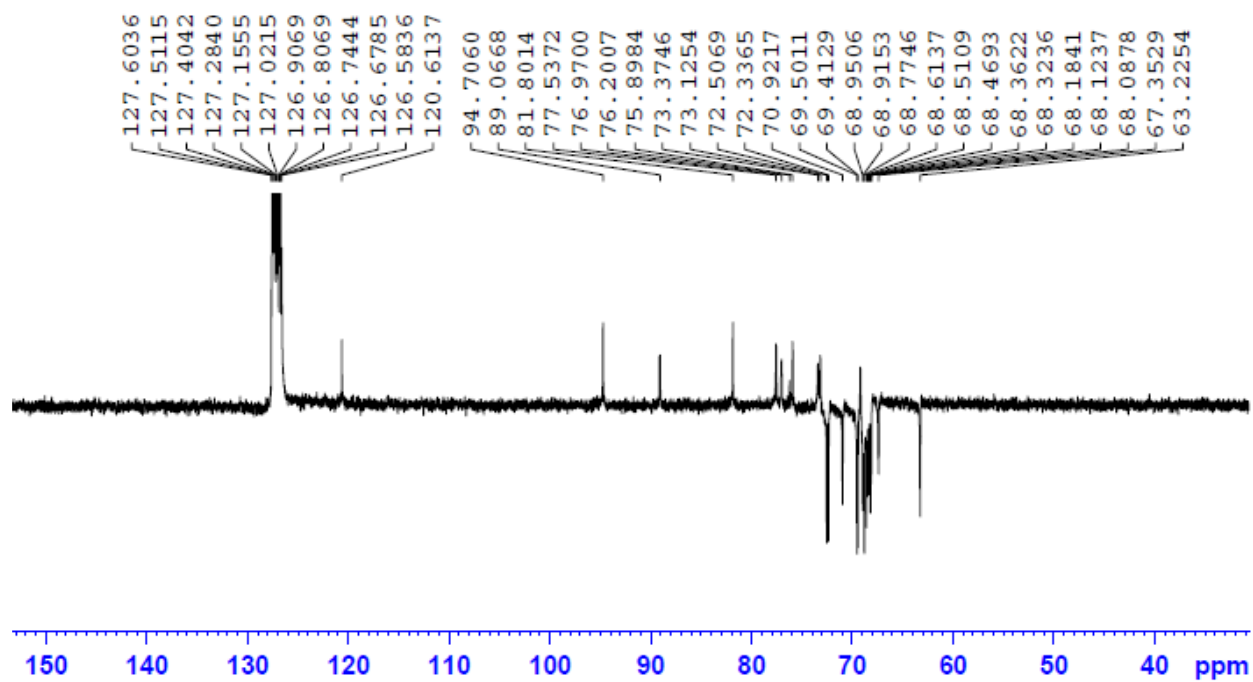

**<sup>31</sup>P NMR of 15b in CDCl<sub>3</sub>**

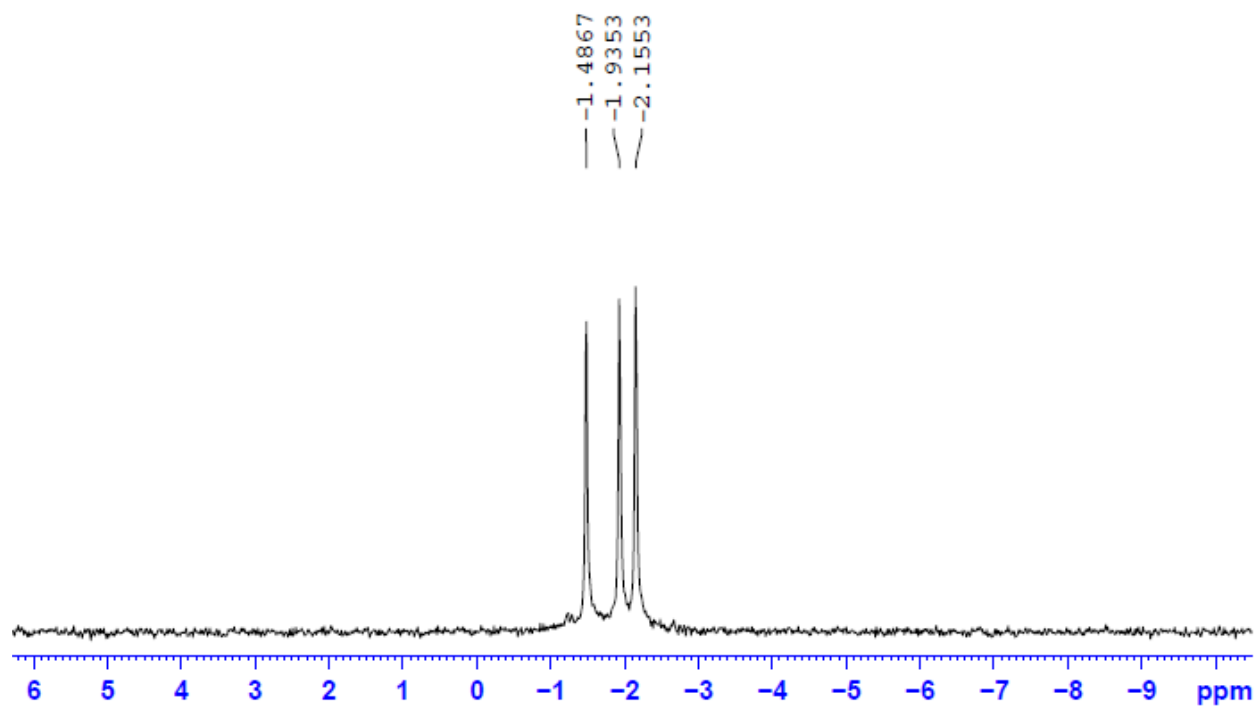

**HMBC NMR of 15b in CDCl<sub>3</sub>**

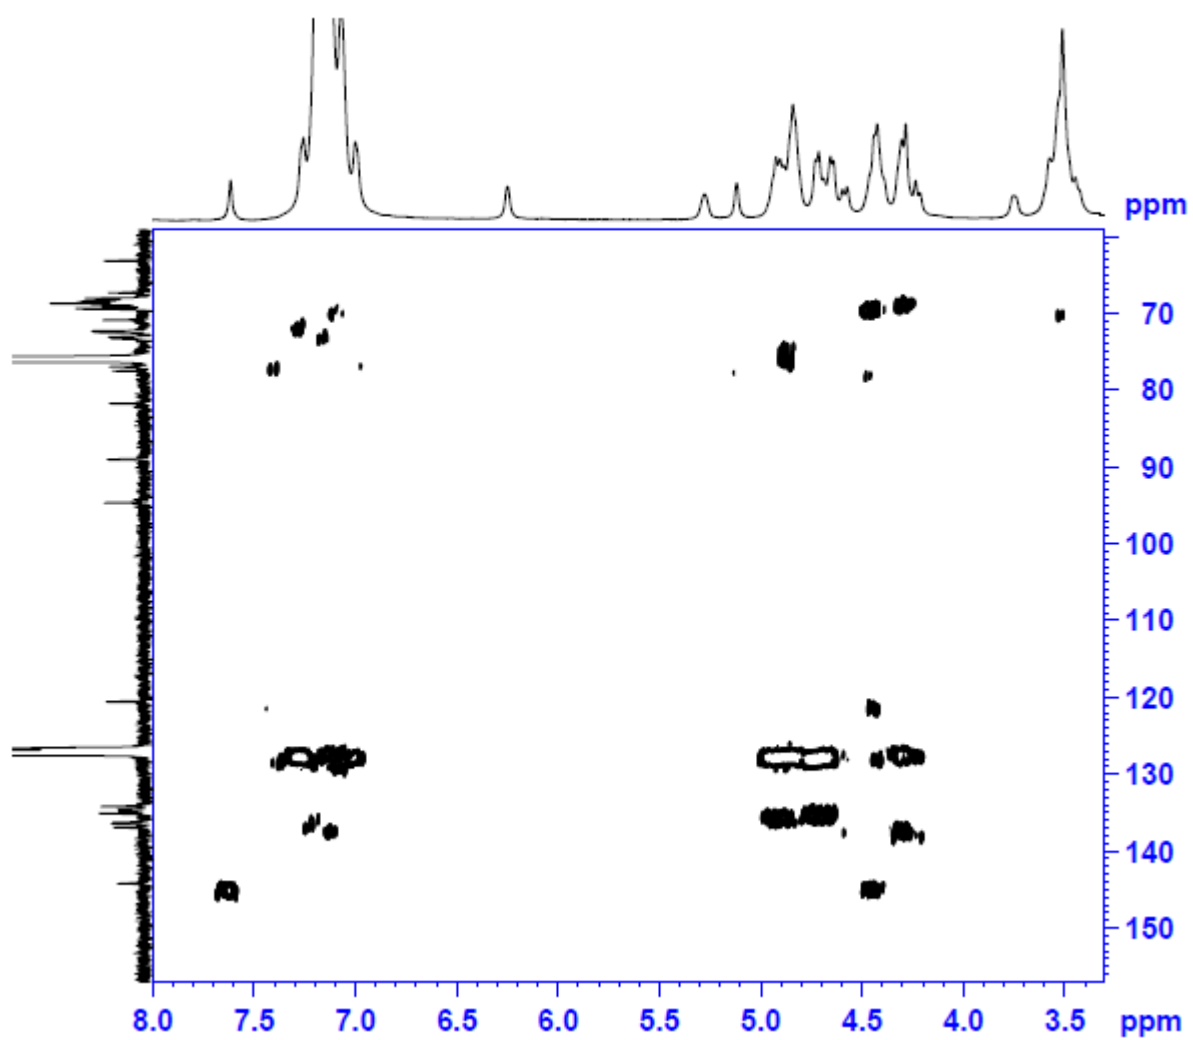

**HMQC NMR of 15b in CDCl<sub>3</sub>**

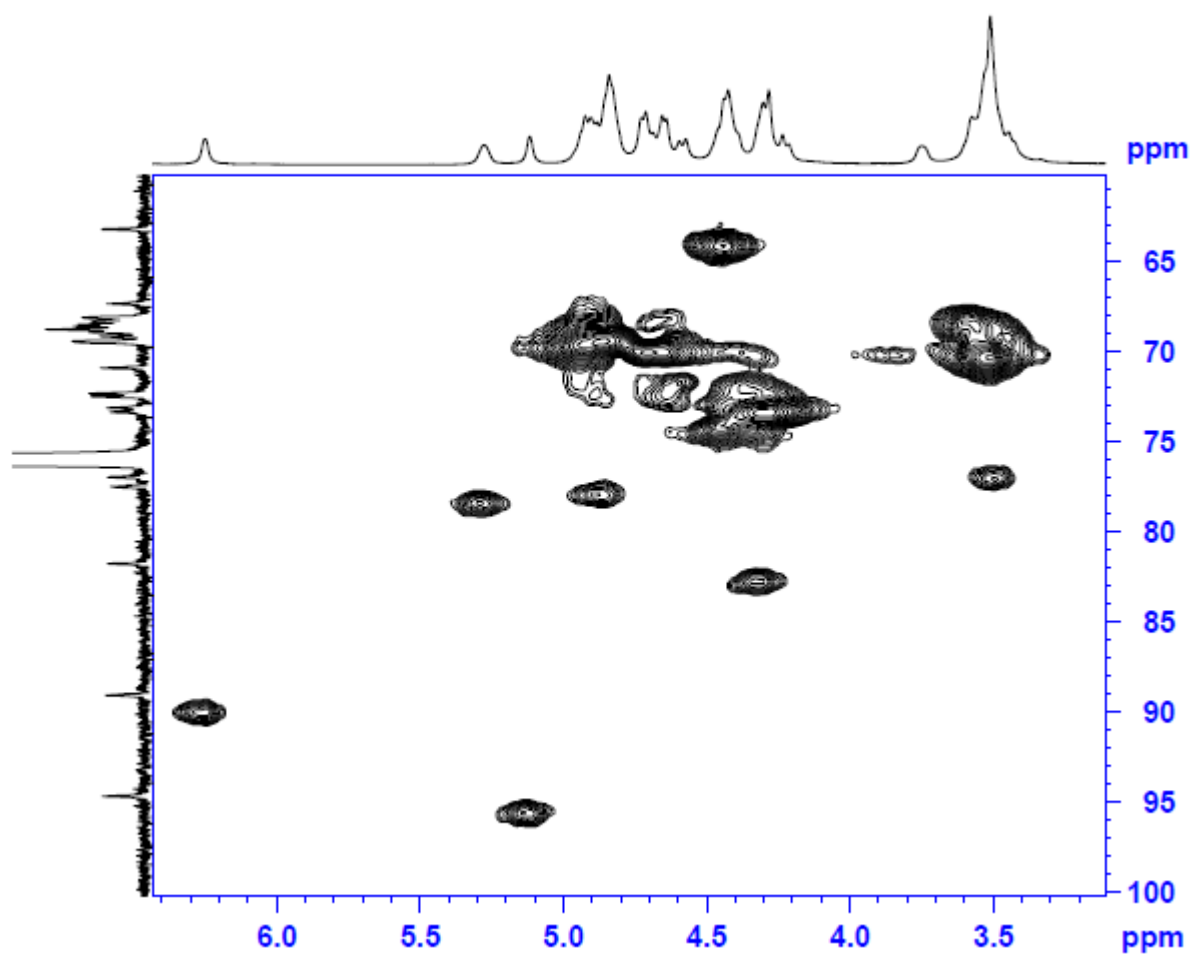

Electronic Supplementary Information

**$^1\text{H}$  NMR of 15c in  $\text{CDCl}_3$**

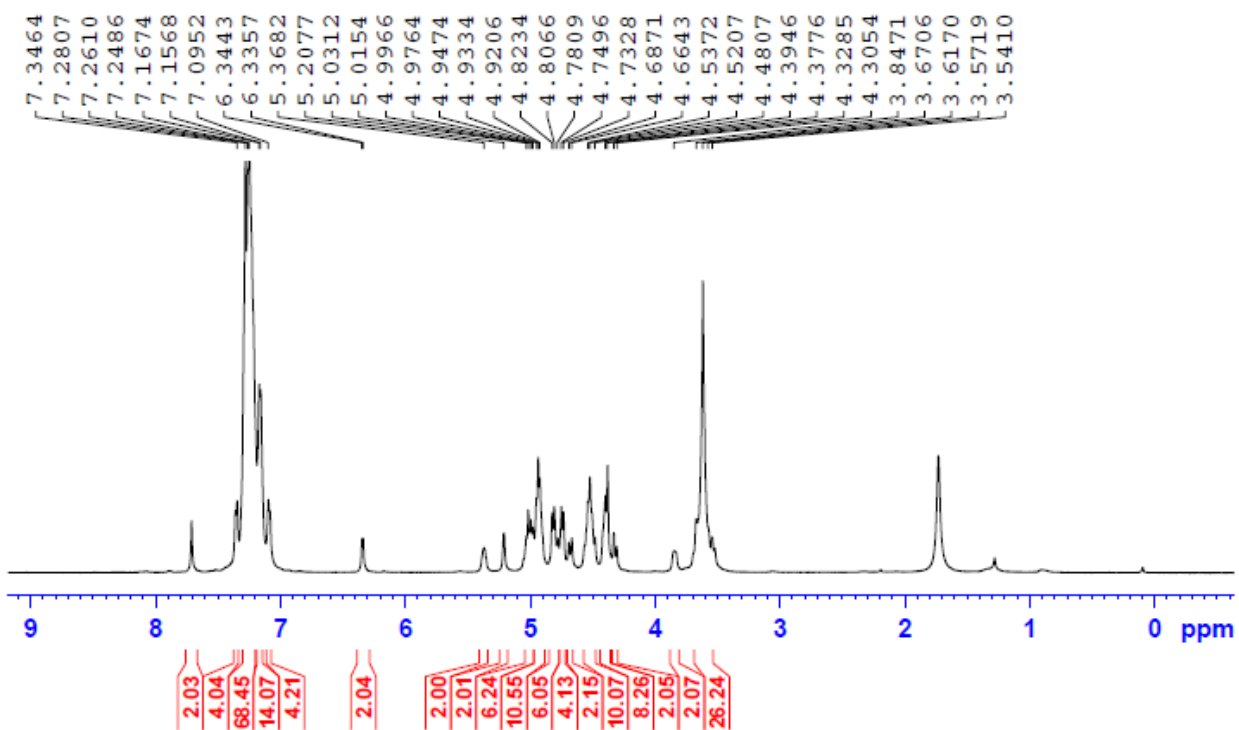

zoom

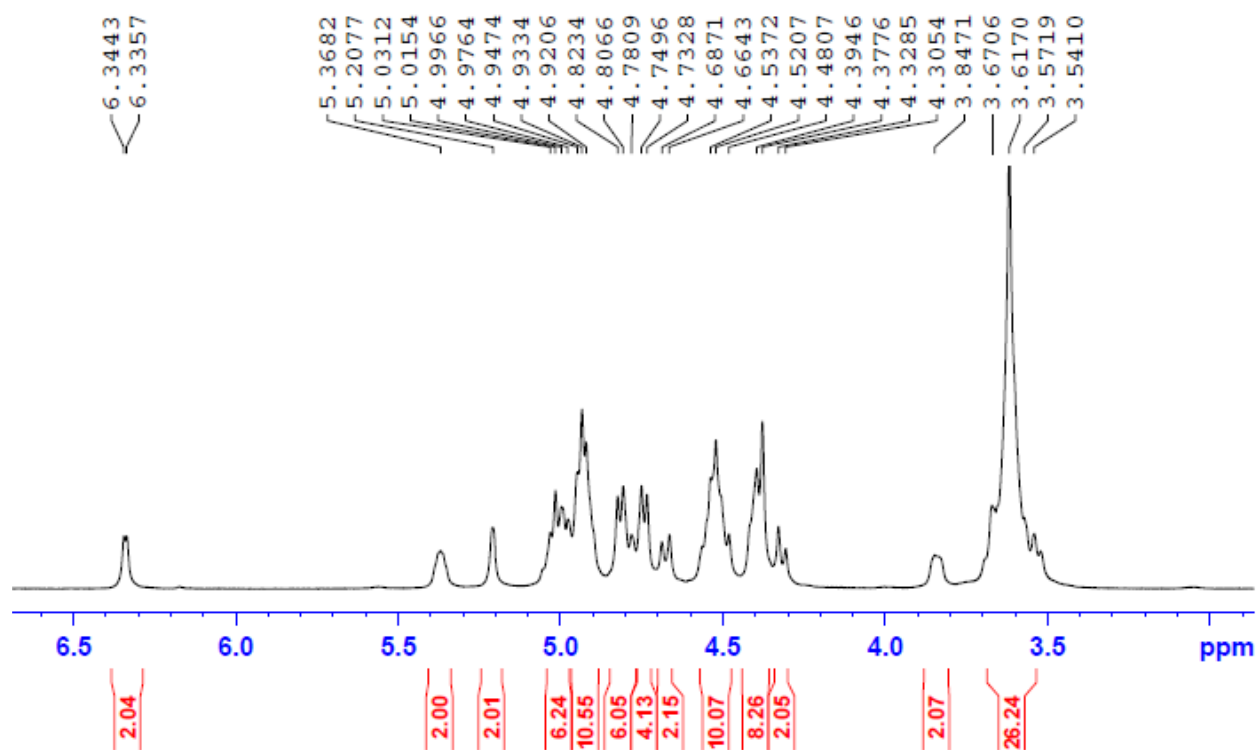

# COSY NMR of 15c in CDCl<sub>3</sub>

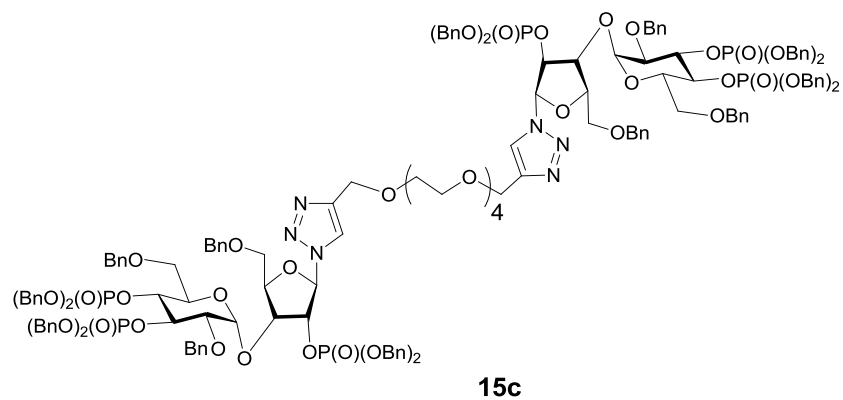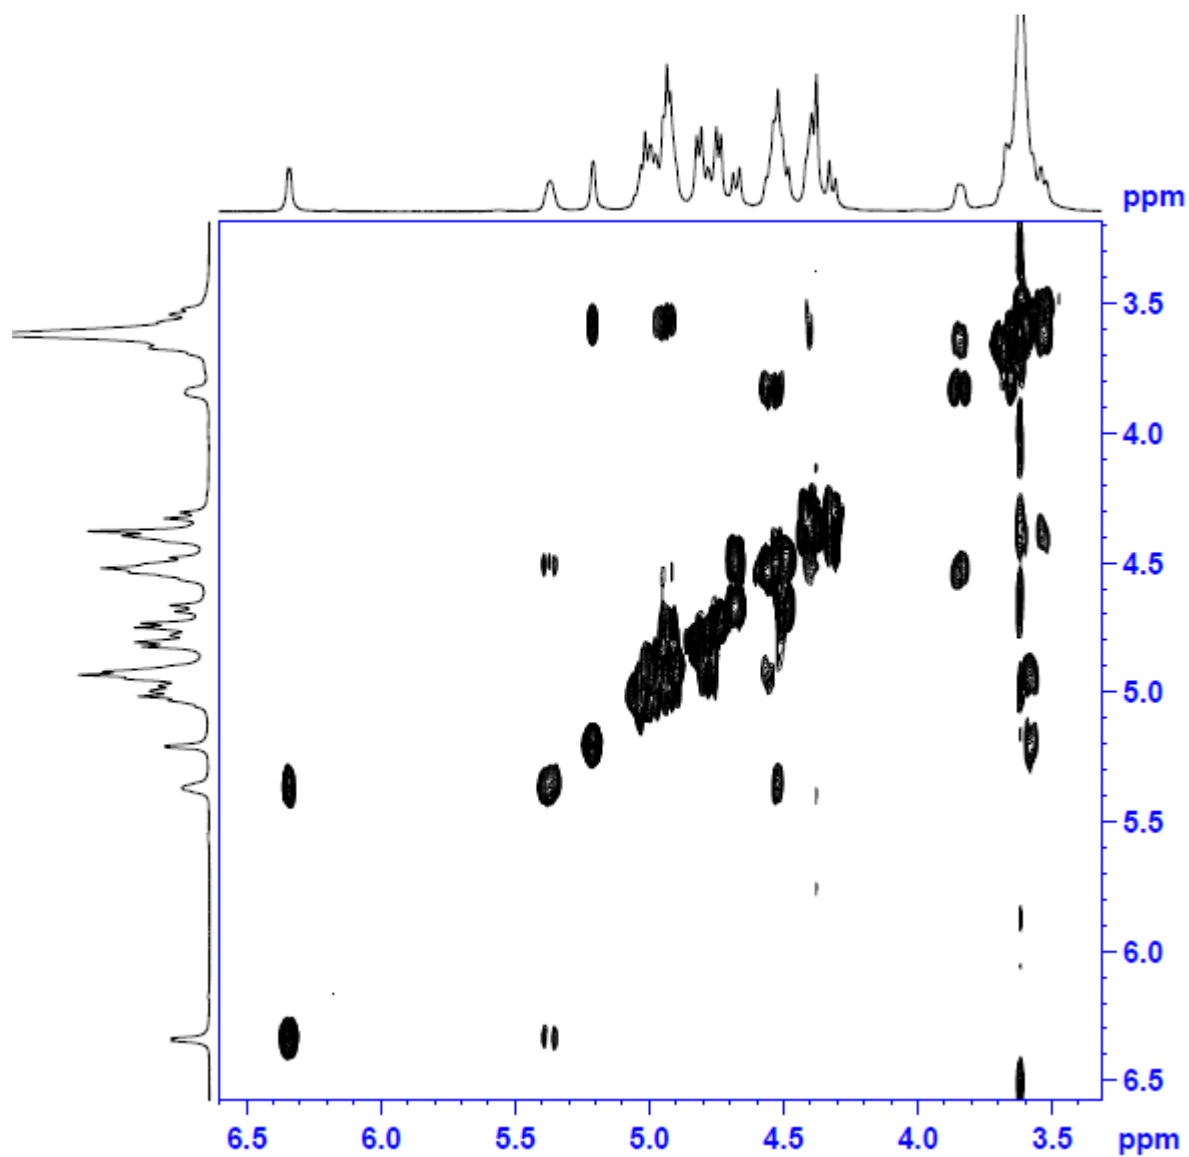

Electronic Supplementary Information

**$^{13}\text{C}$  NMR of 15c in  $\text{CDCl}_3$**

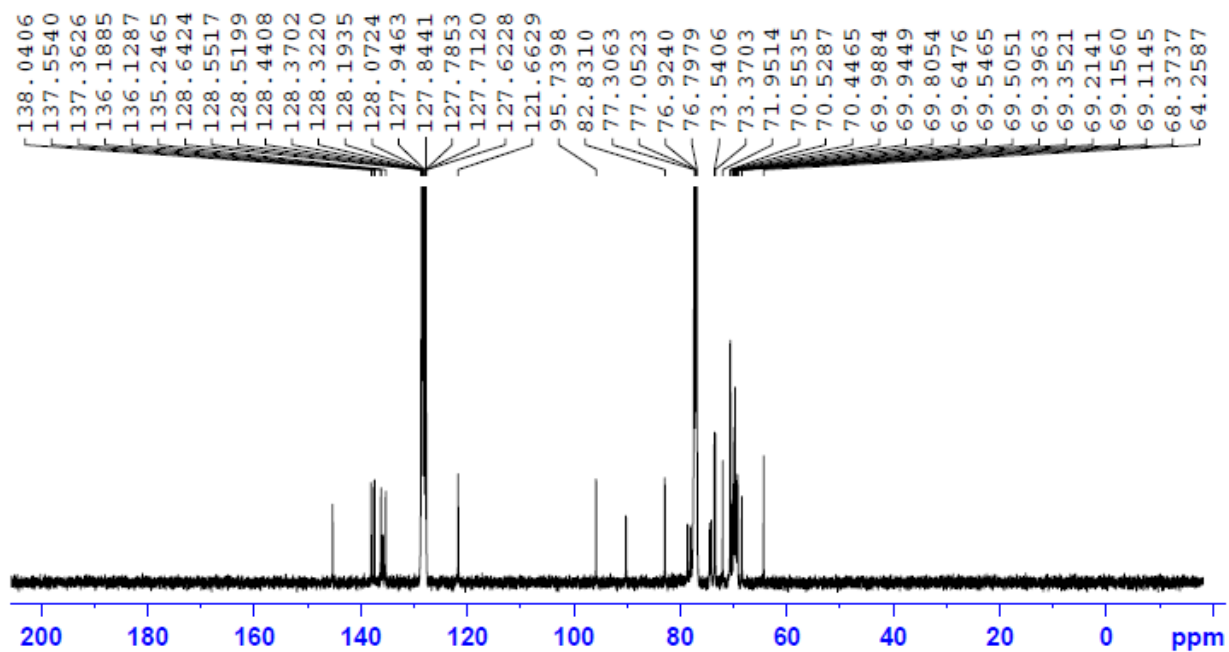

zoom

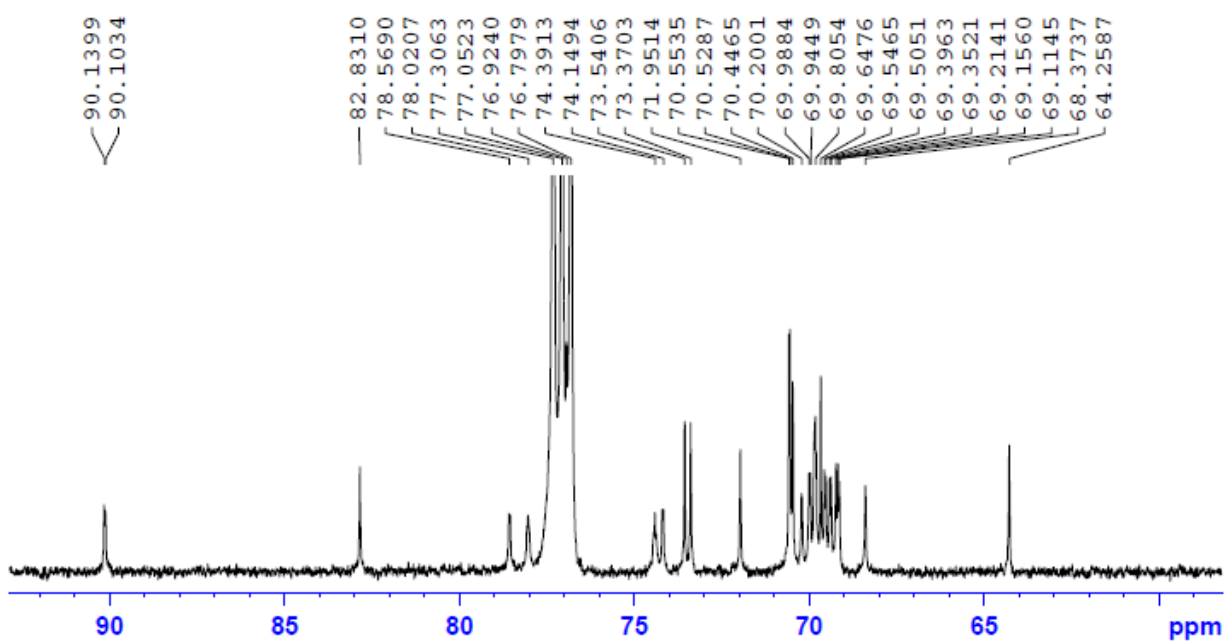



**DEPT NMR of 15c in CDCl<sub>3</sub>**

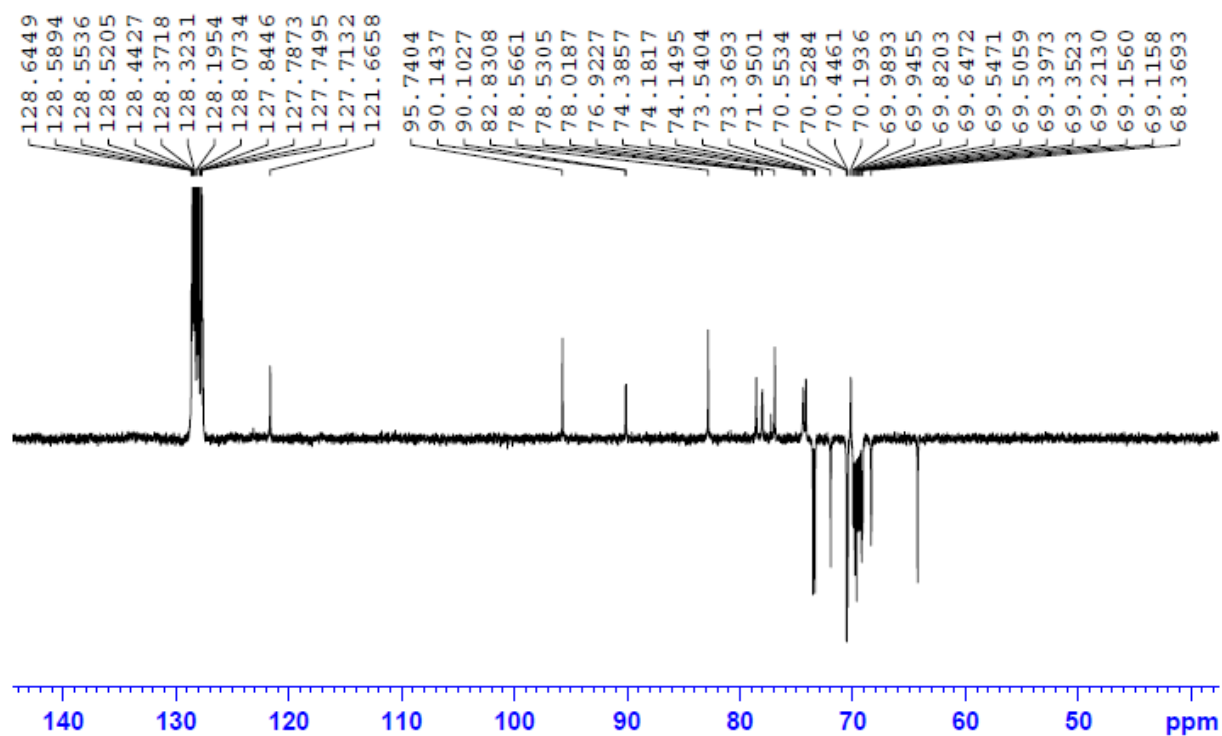

**<sup>31</sup>P NMR of 15c in CDCl<sub>3</sub>**

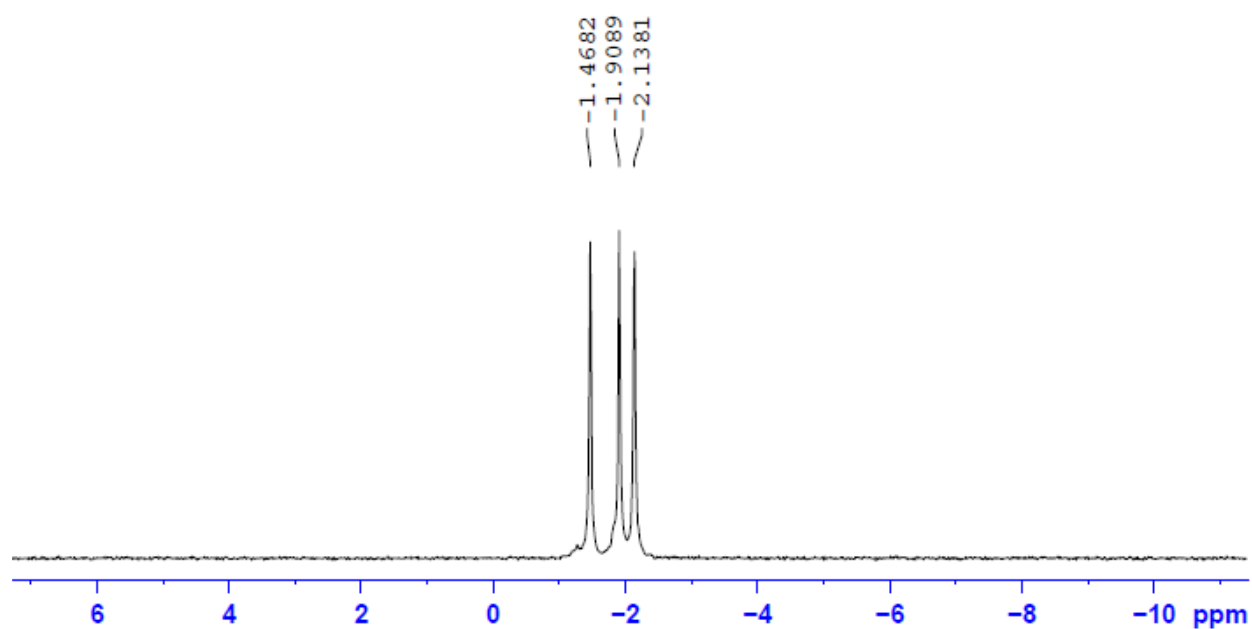

**HMBC NMR of 15c in CDCl<sub>3</sub>**

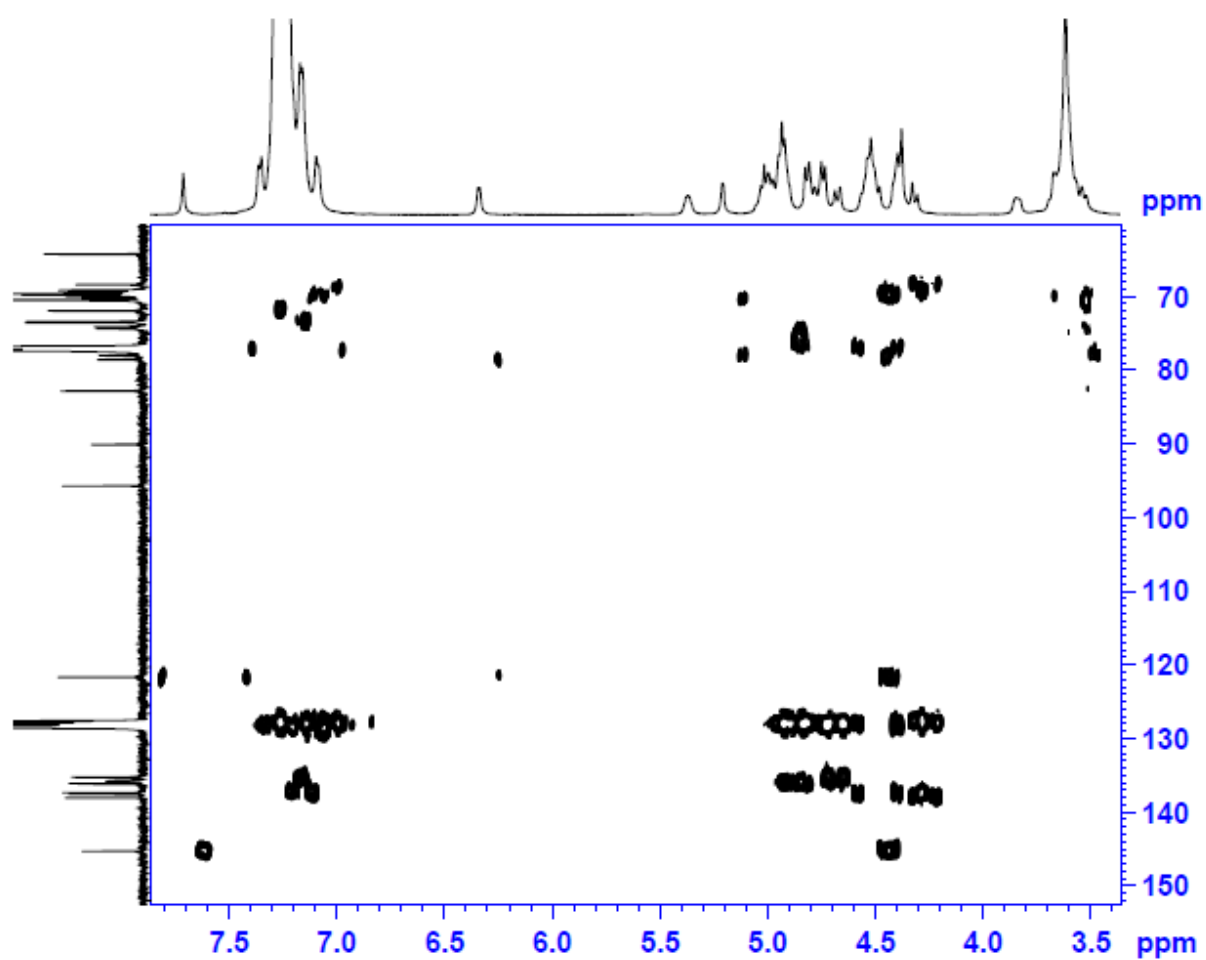

**HMQC NMR of 15c in CDCl<sub>3</sub>**

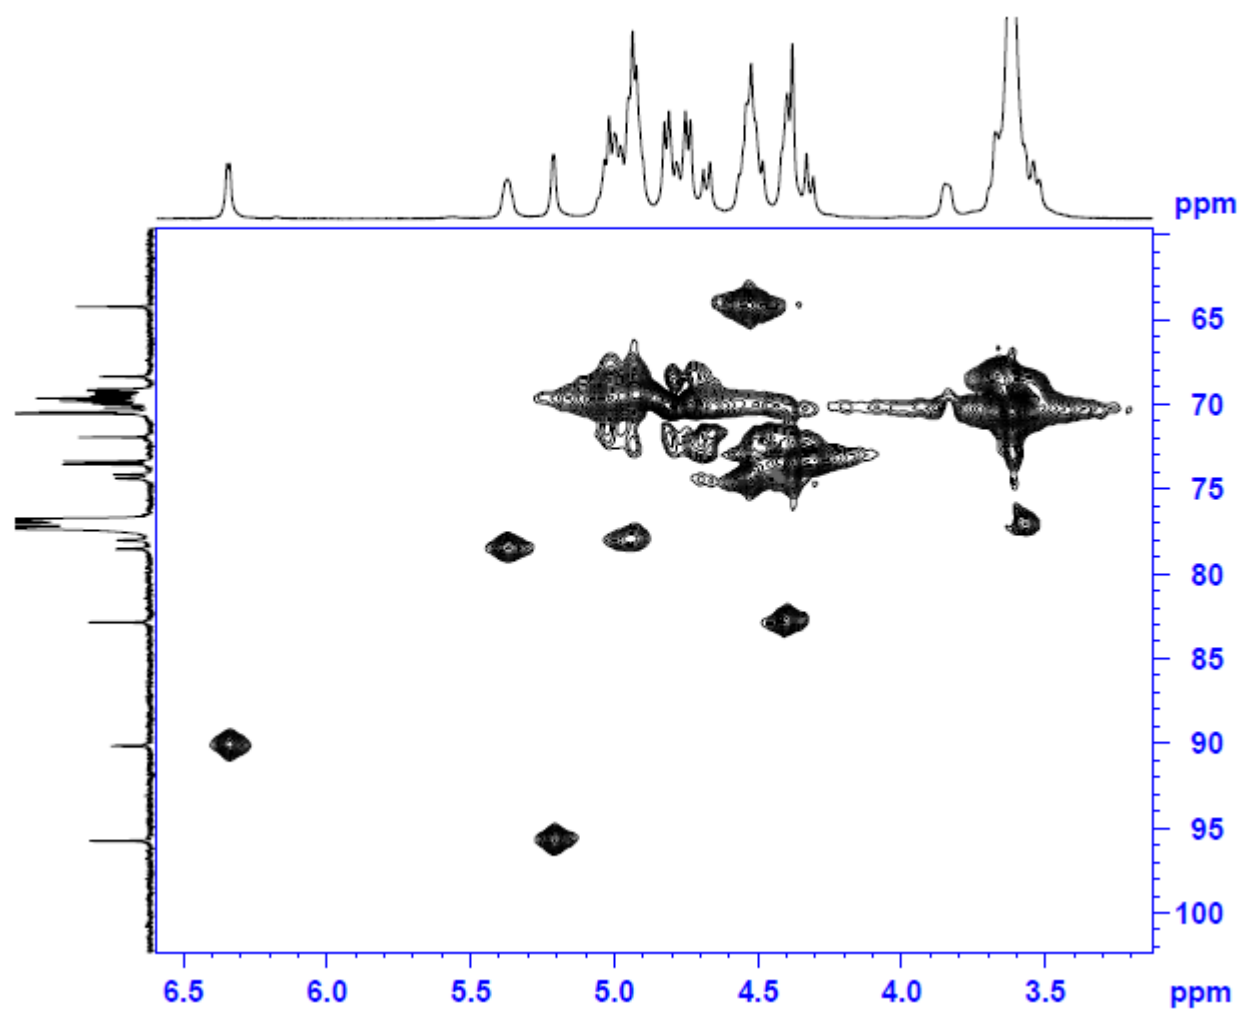

Electronic Supplementary Information

**$^1\text{H}$  NMR of 15d in  $\text{CDCl}_3$**

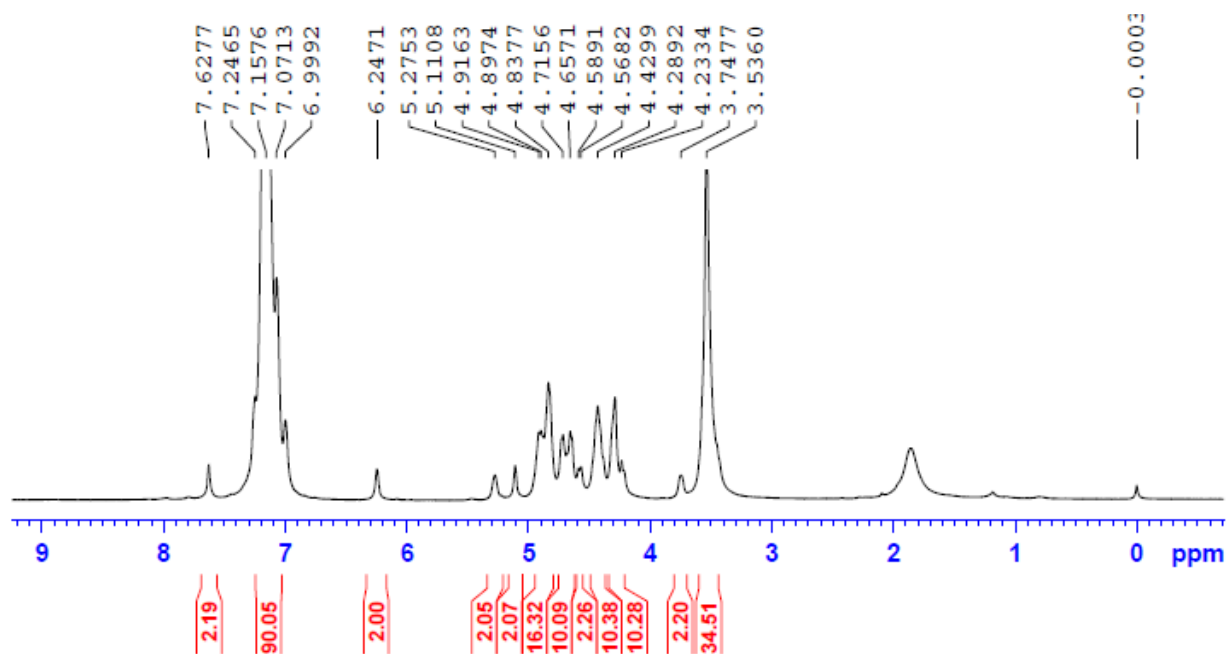

**$^{31}\text{P}$  NMR of 15d in  $\text{CDCl}_3$**

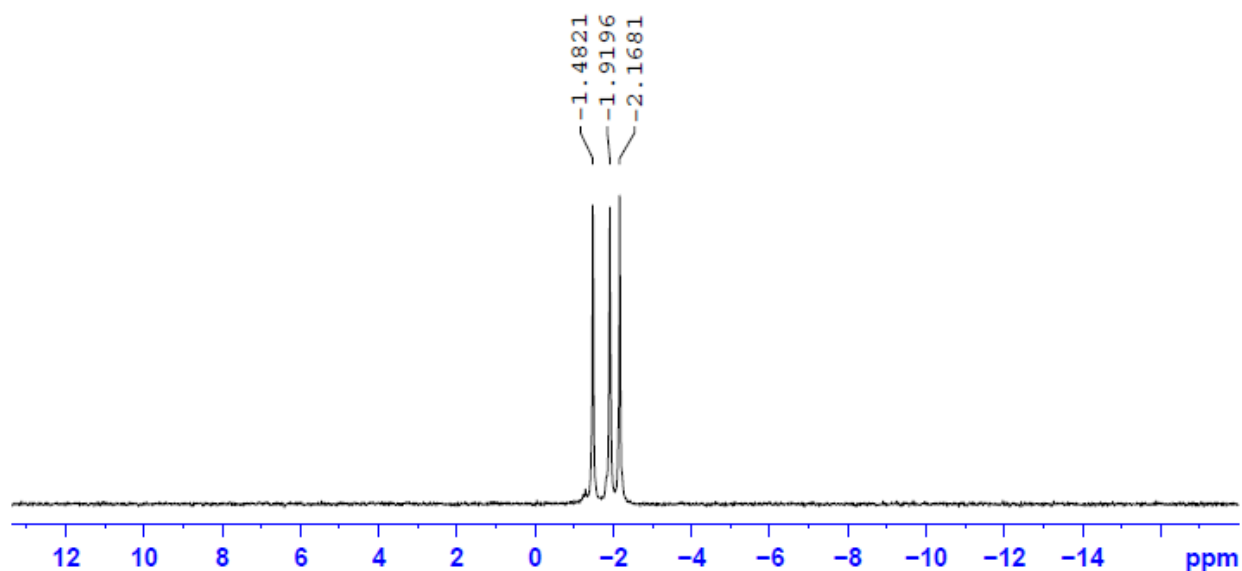

# COSY NMR of 15d in CDCl<sub>3</sub>

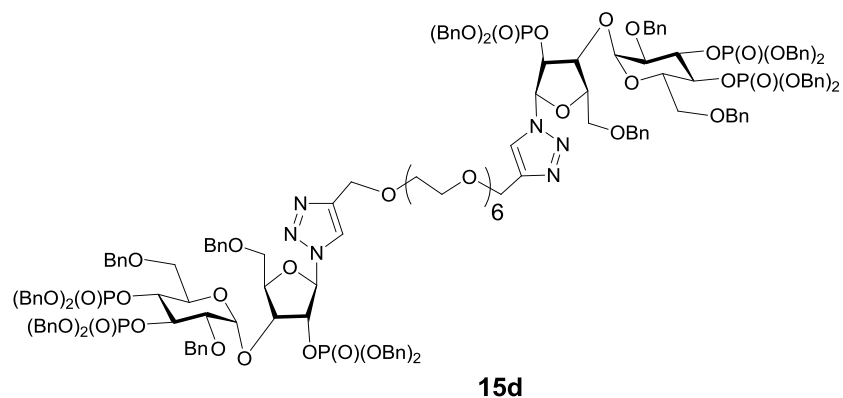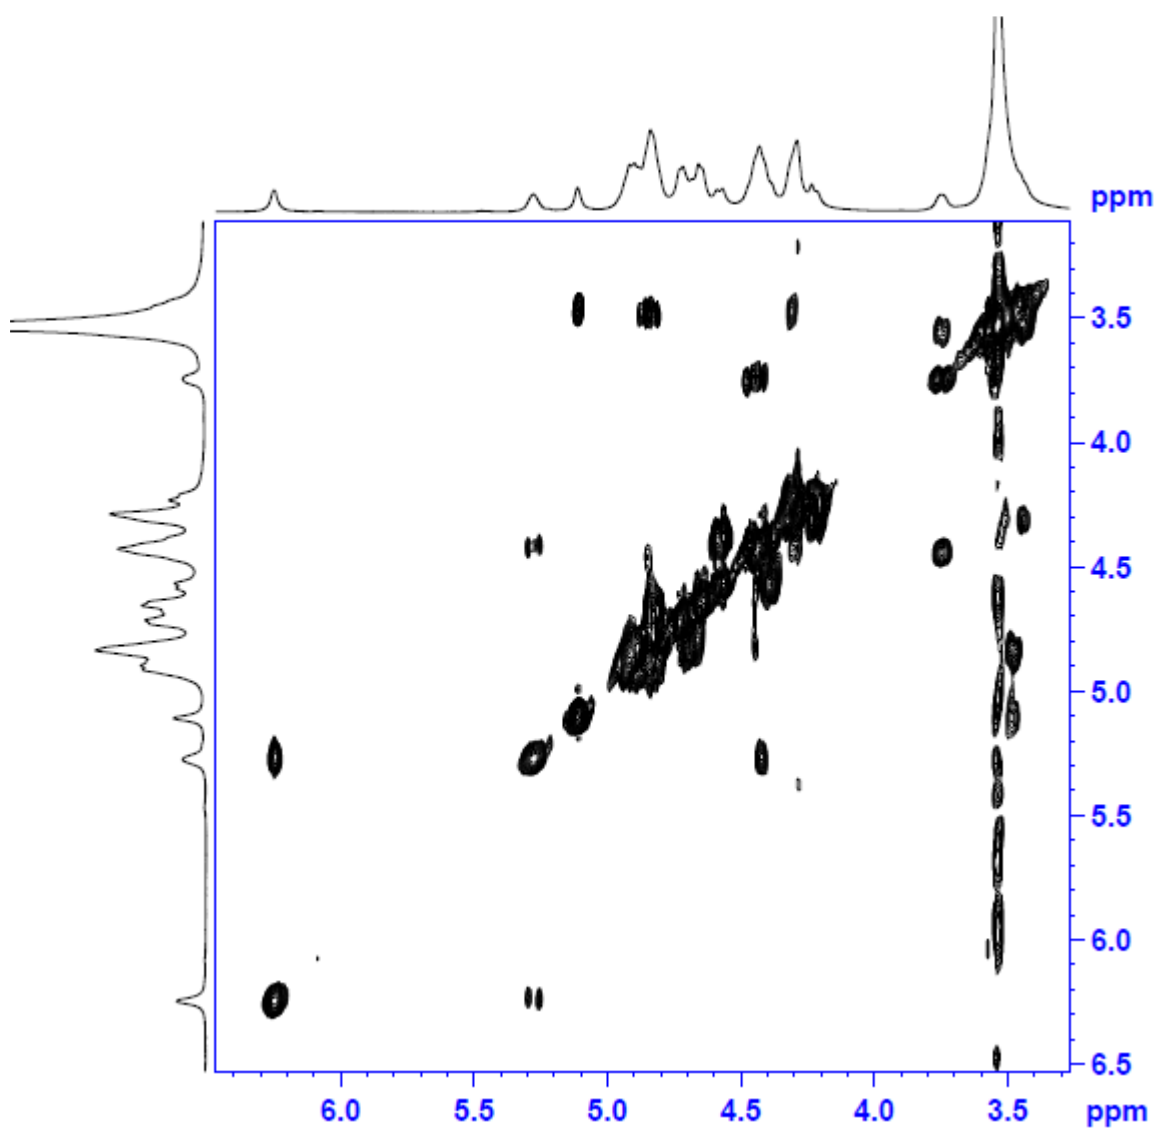

Electronic Supplementary Information

**$^{13}\text{C}$  NMR of 15d in  $\text{CDCl}_3$**

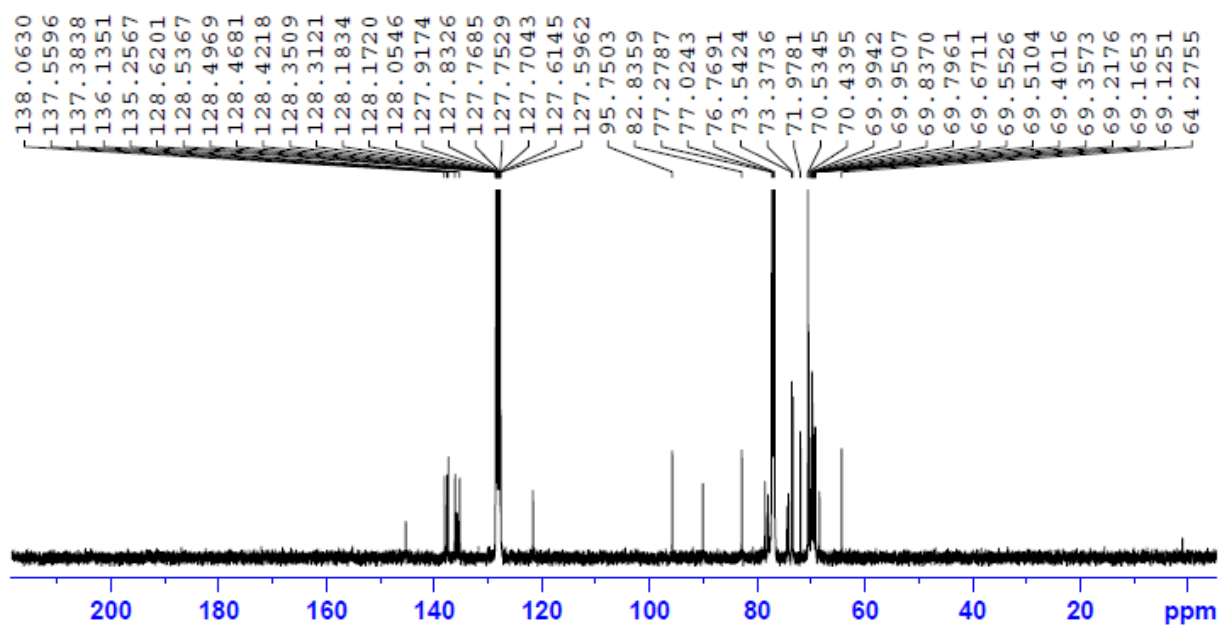

zoom

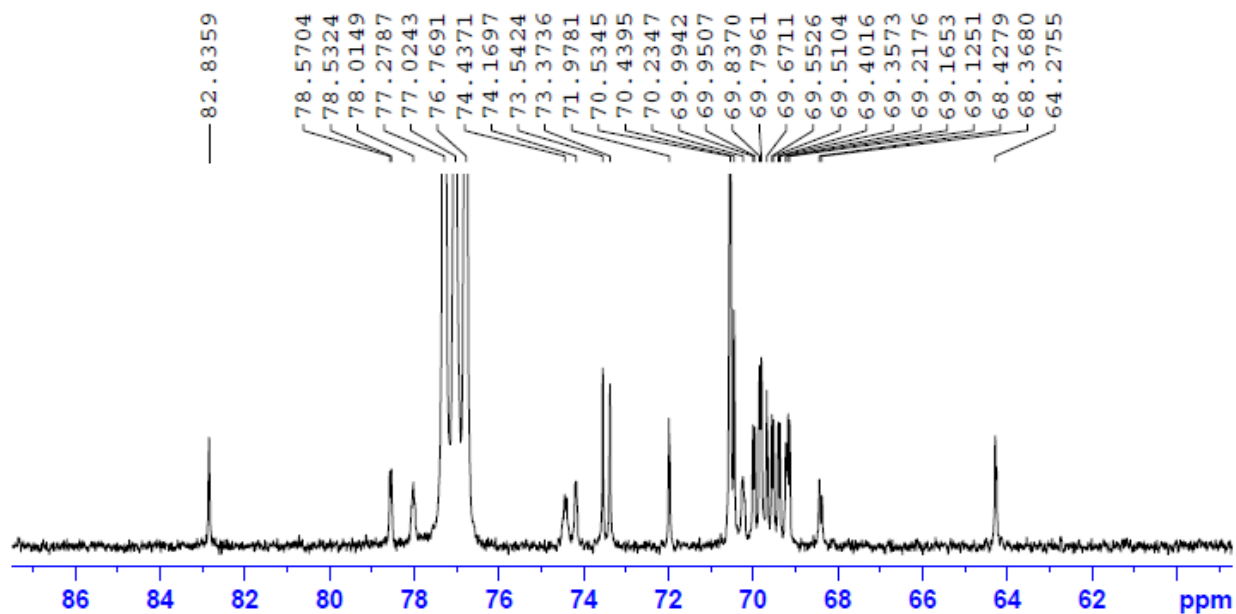

**DEPT NMR of 15d in CDCl<sub>3</sub>**

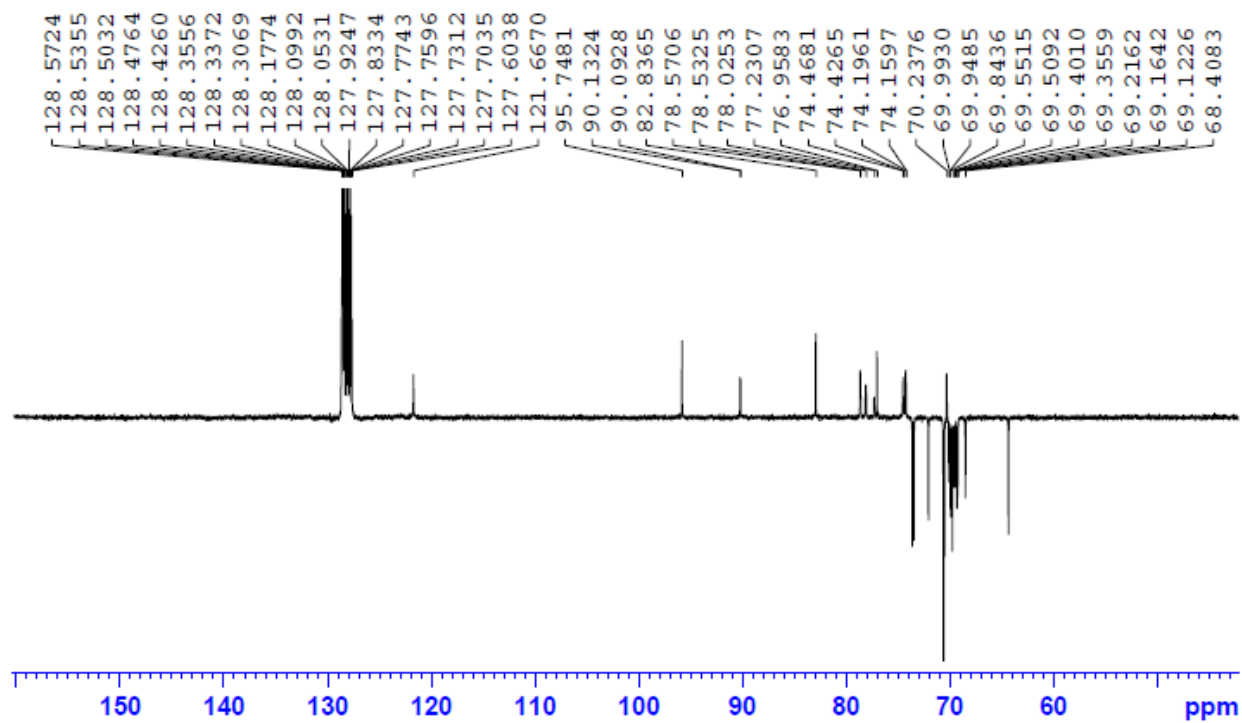

HMBC NMR of 15d in CDCl<sub>3</sub>

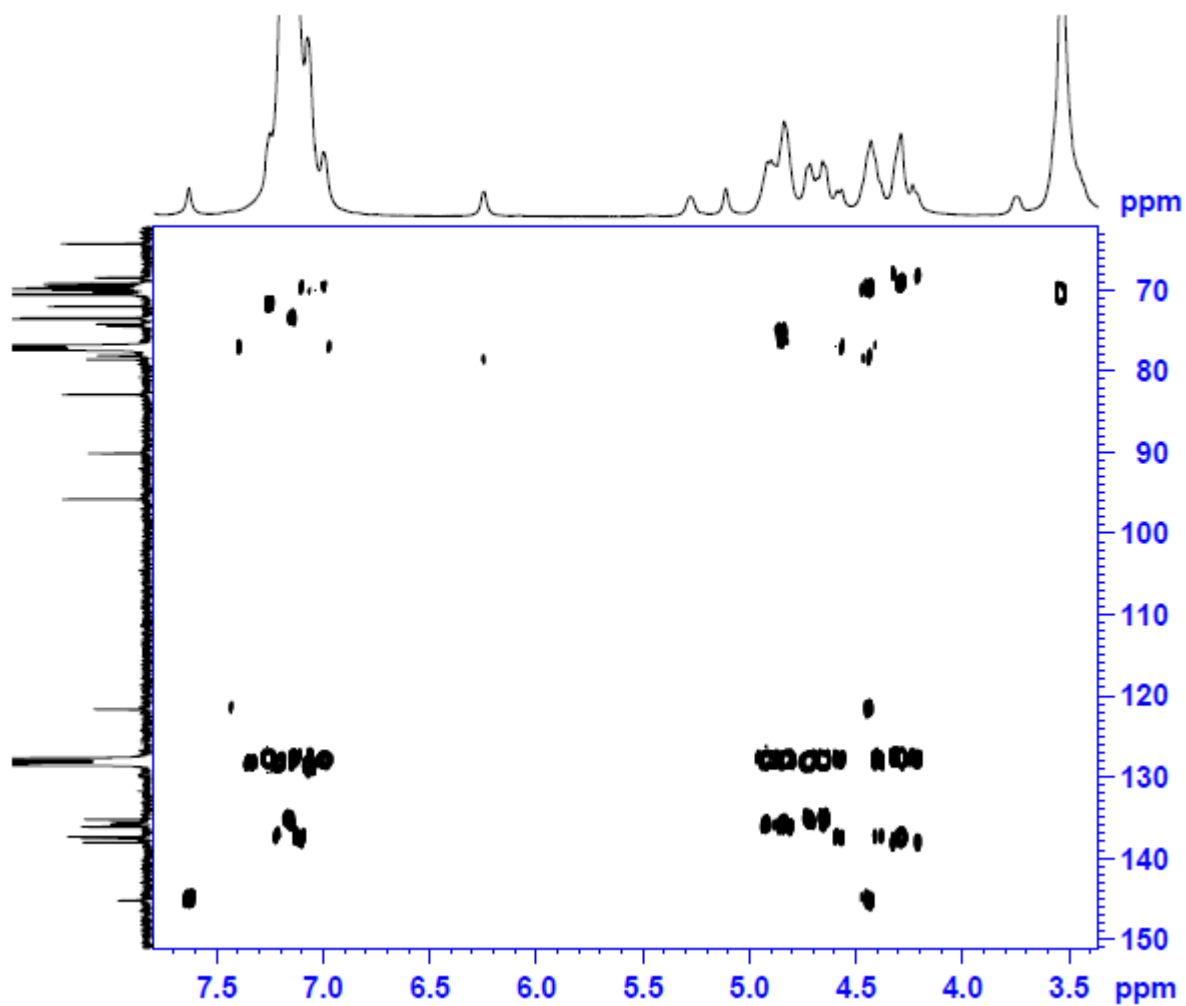



**HMQC NMR of 15d in CDCl<sub>3</sub>**

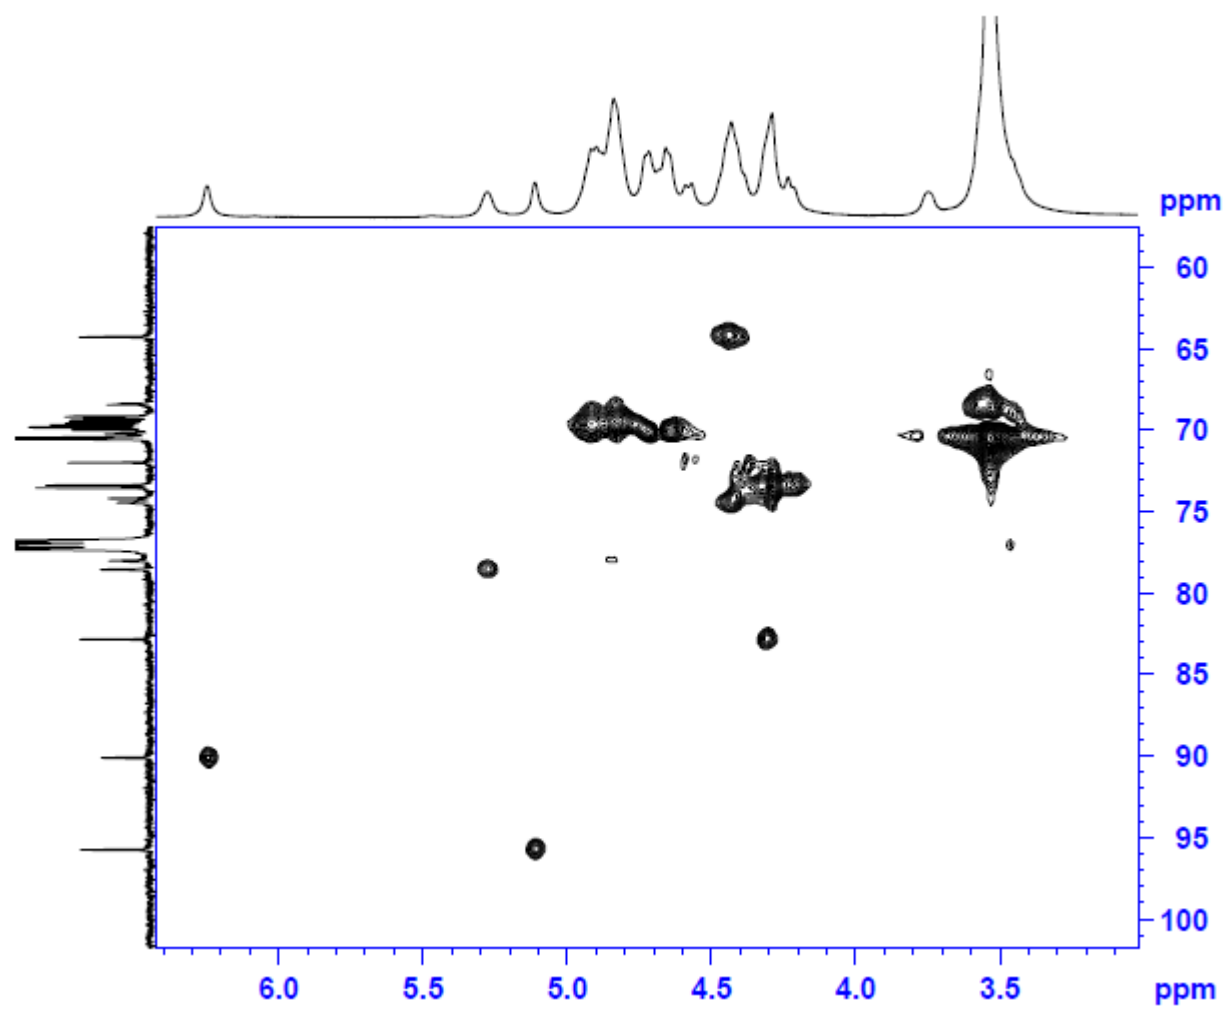

**$^1\text{H}$  NMR of 12a in  $\text{D}_2\text{O}$** 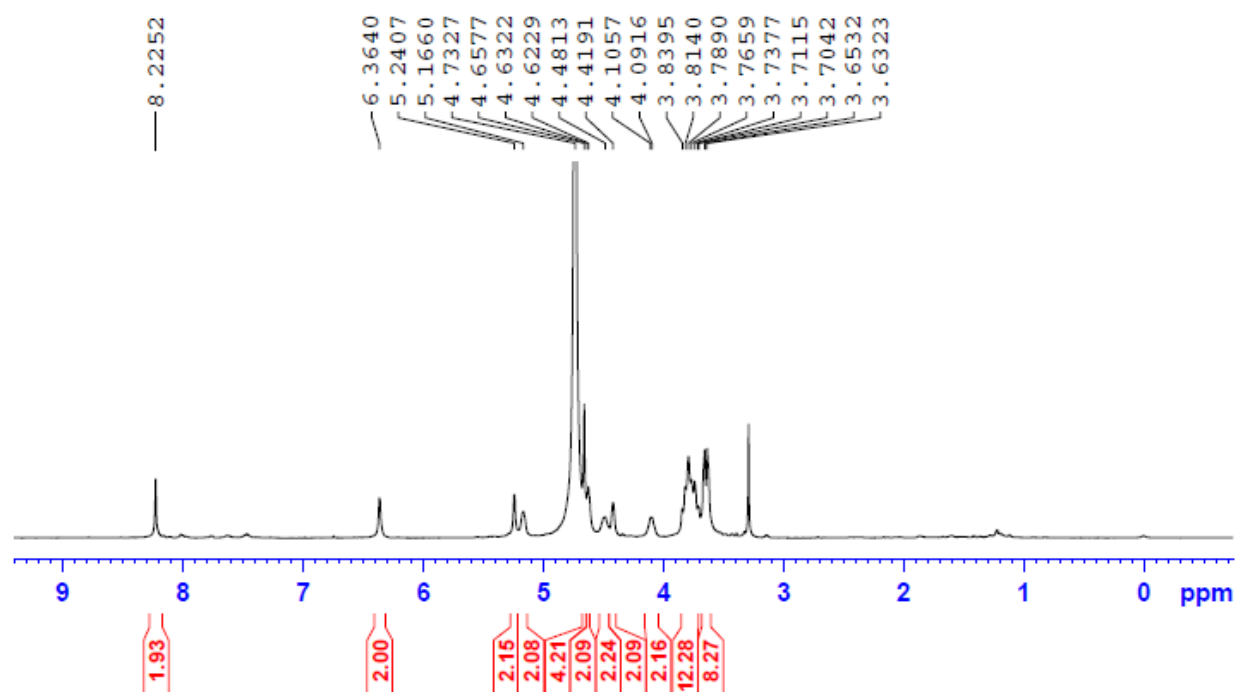

zoom

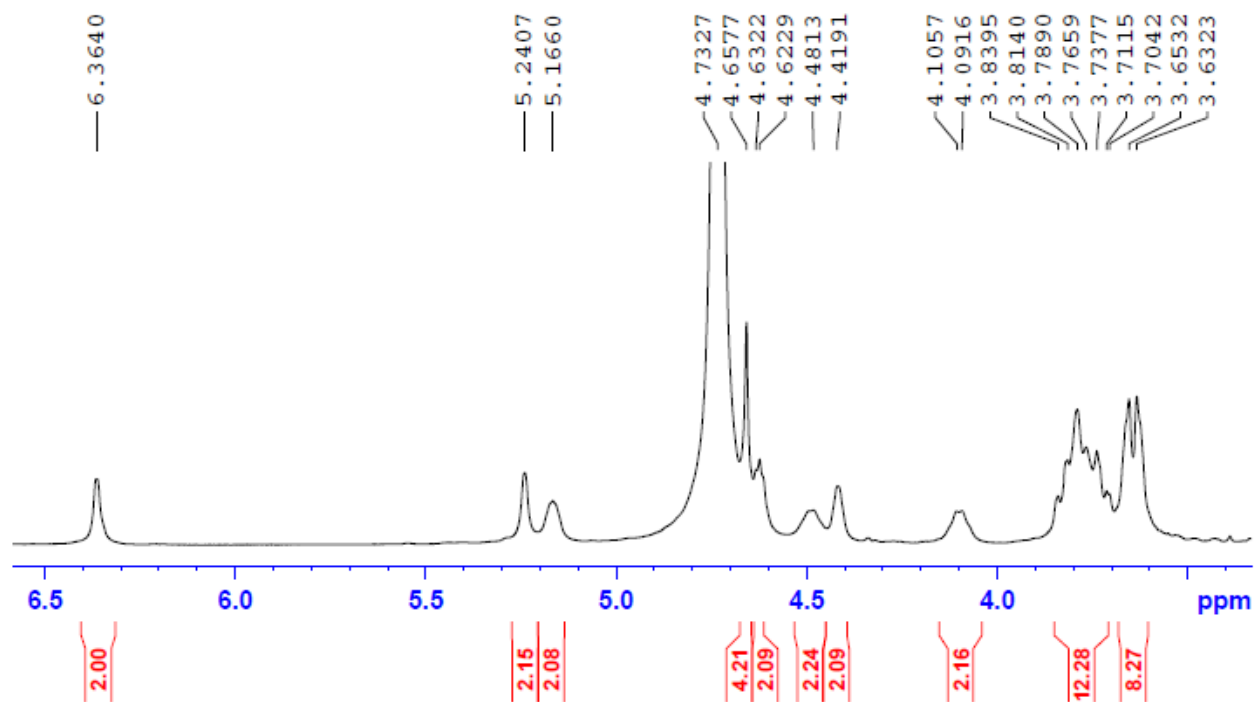

# COSY NMR of 12a in D<sub>2</sub>O

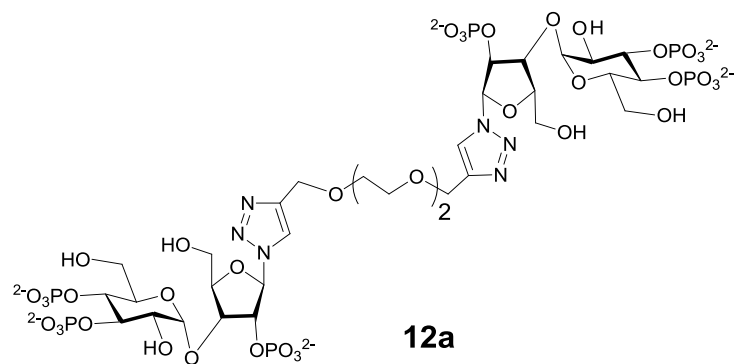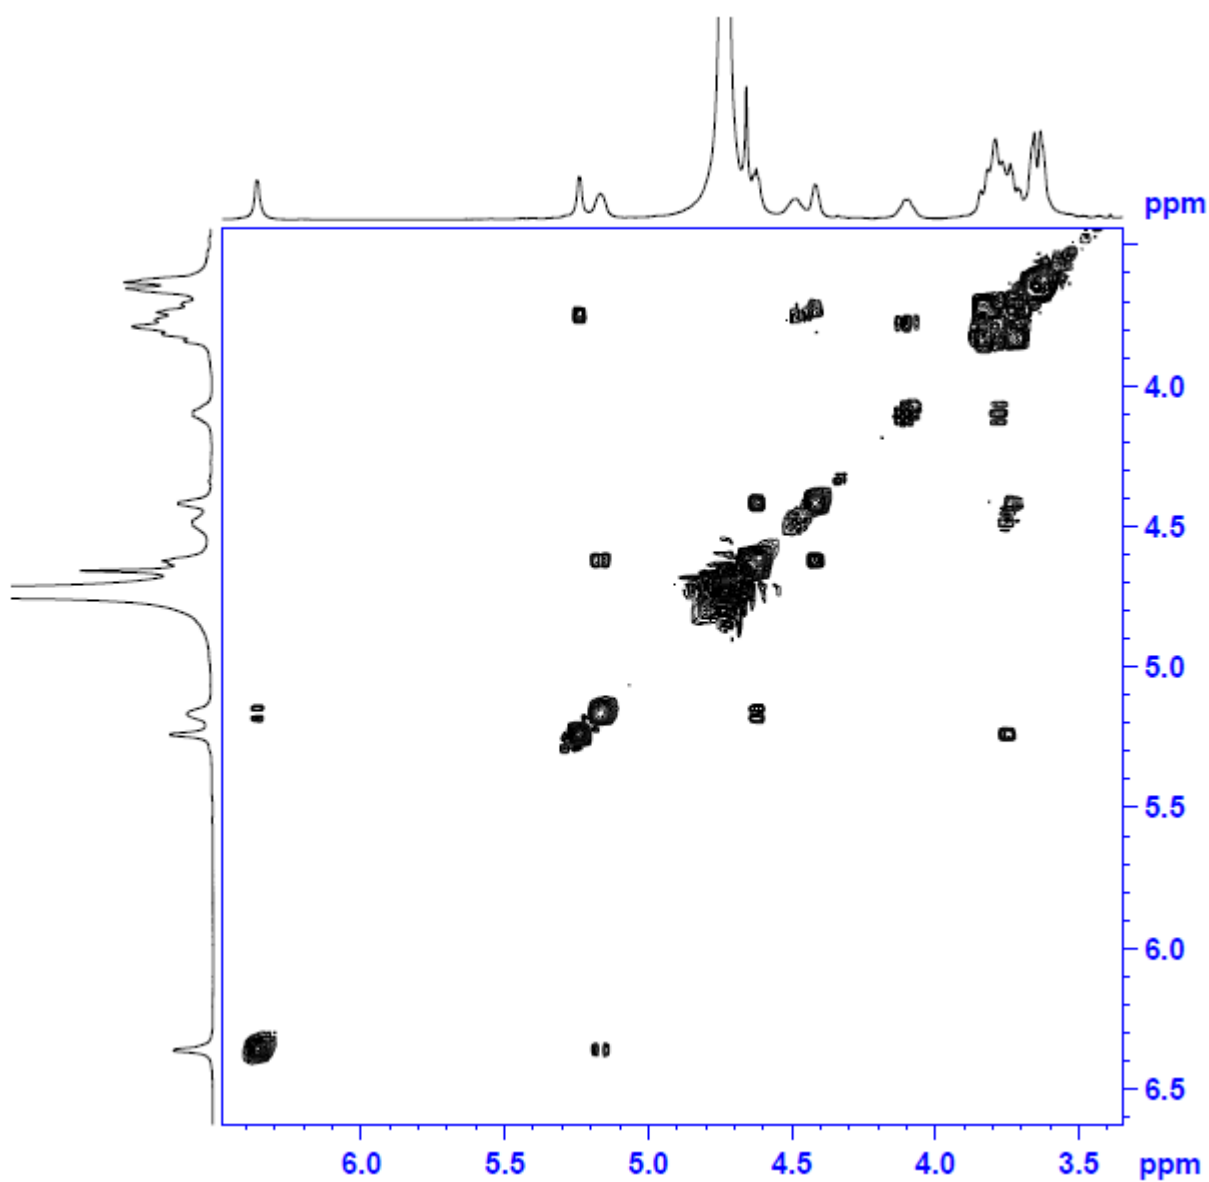

**$^{13}\text{C}$  NMR of 12a in  $\text{D}_2\text{O}$**

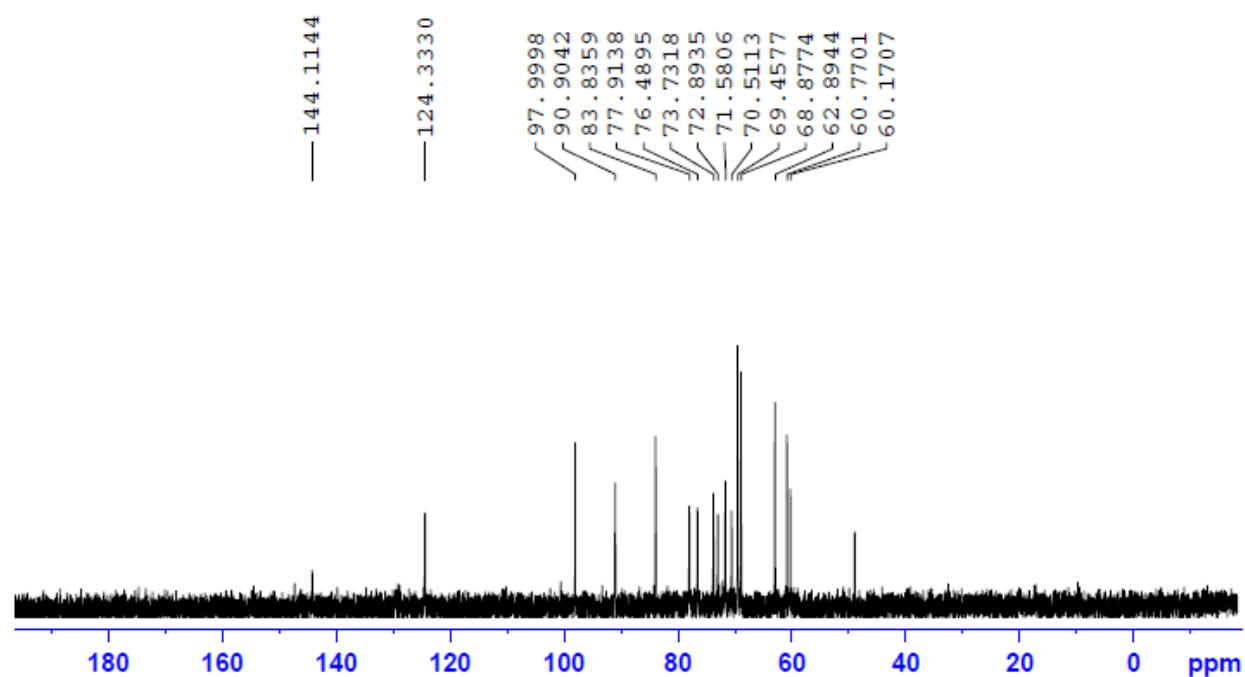

zoom

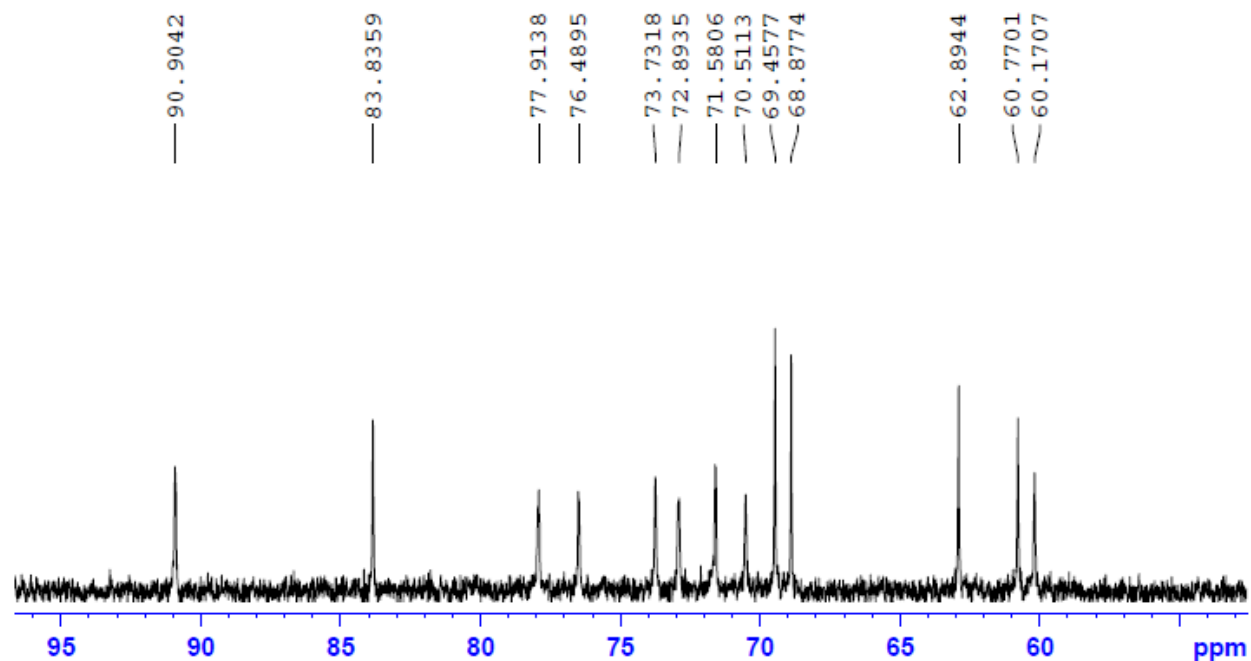

**DEPT NMR of 12a in D<sub>2</sub>O**

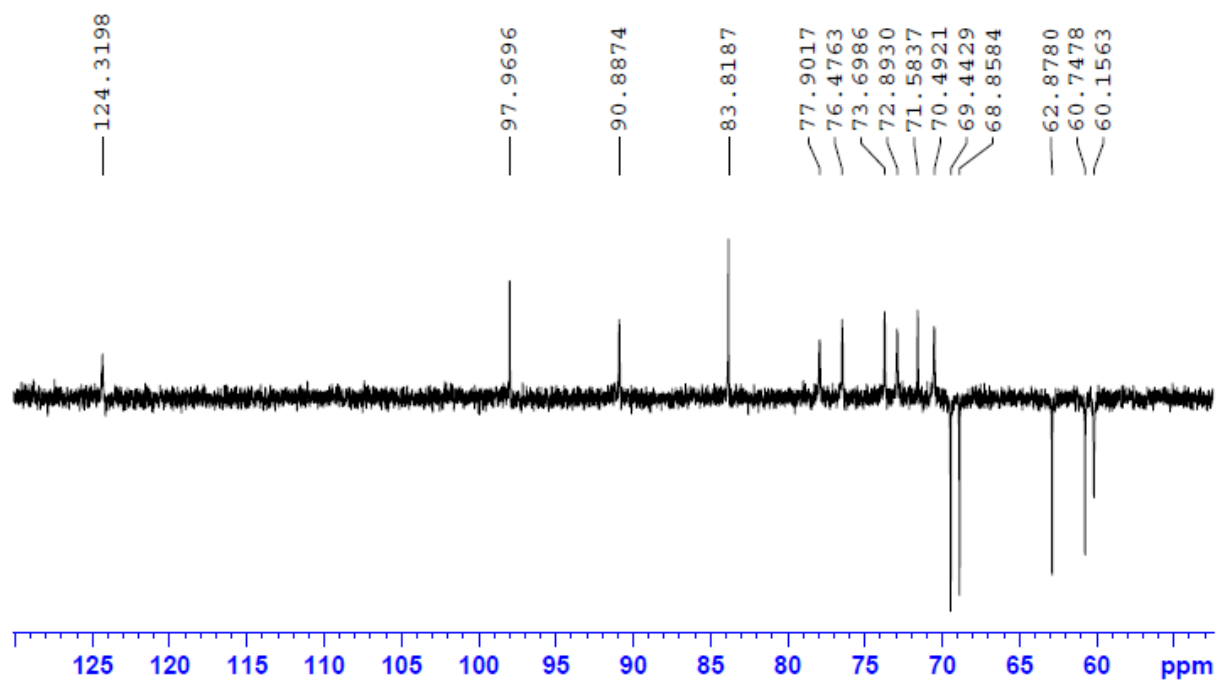

**<sup>31</sup>P NMR of 12a in D<sub>2</sub>O**

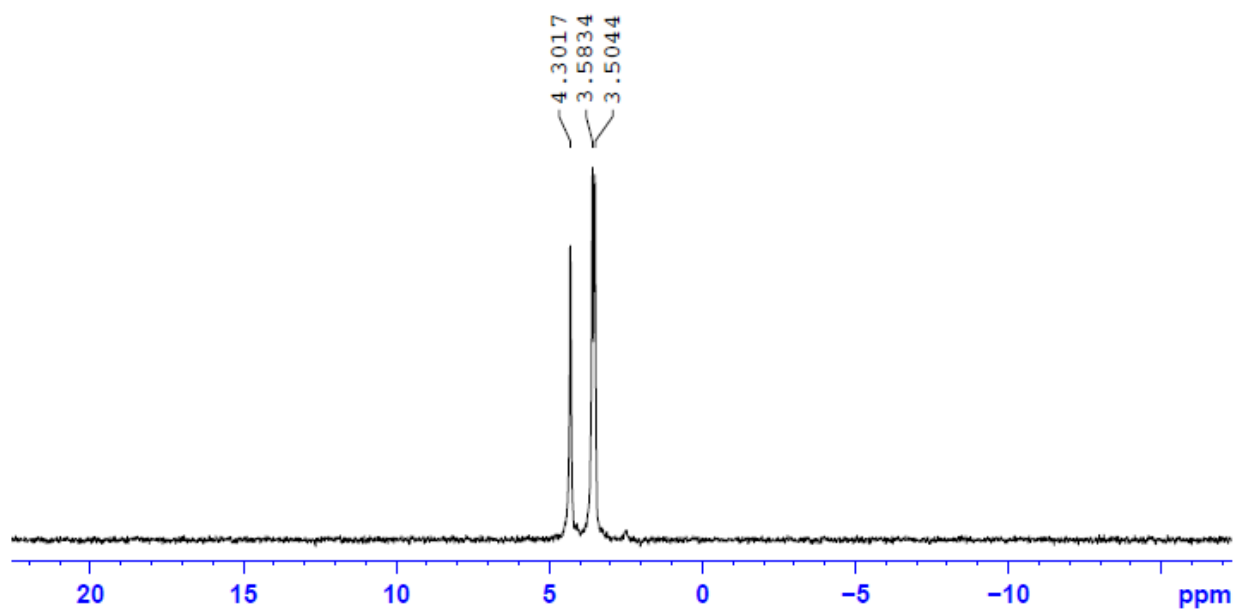

**HMQC NMR of 12a in D<sub>2</sub>O**

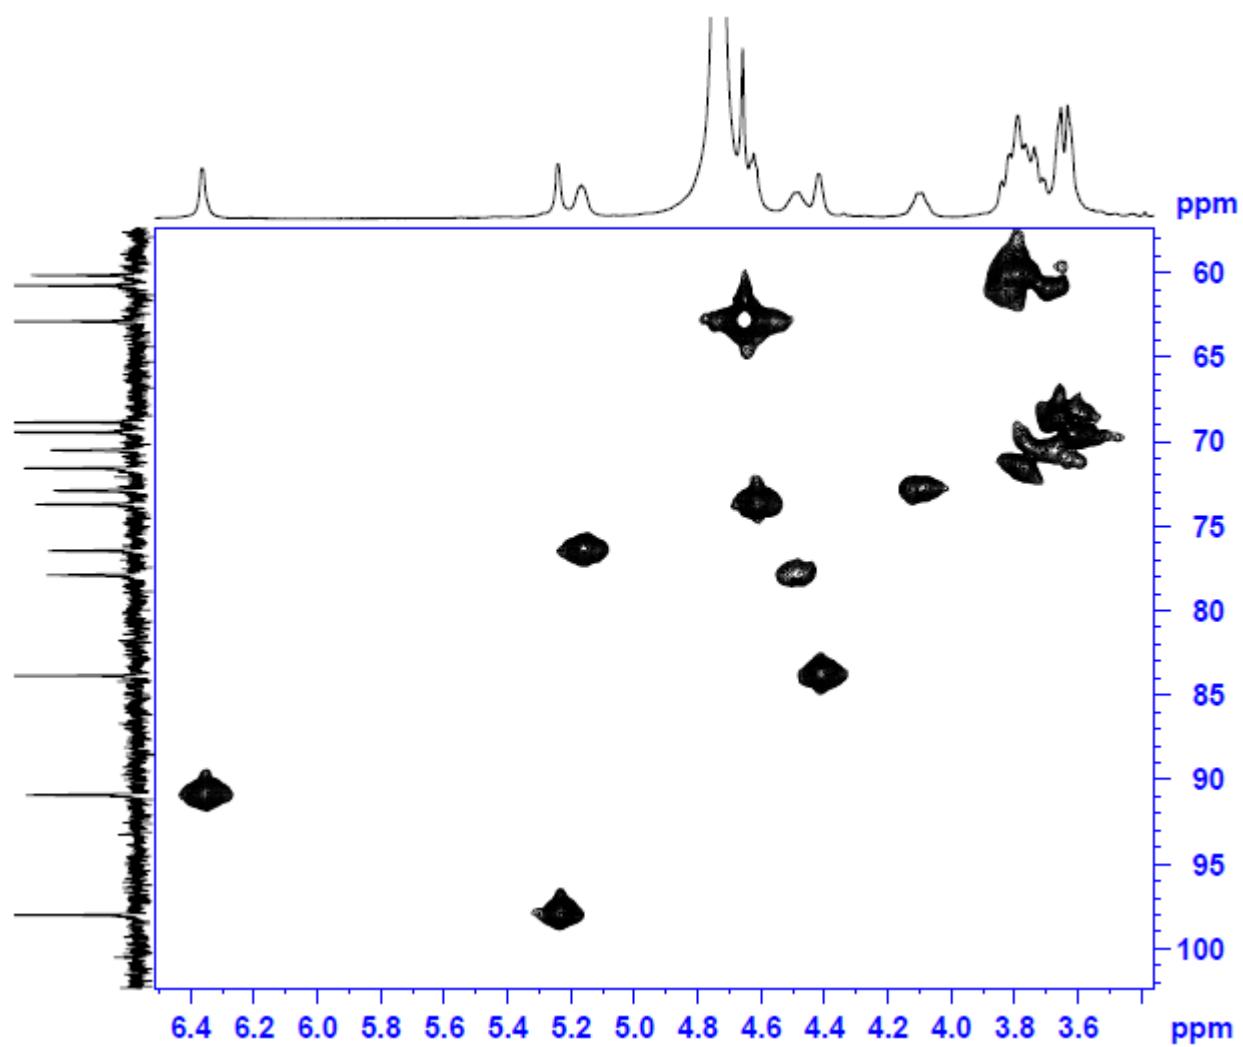

**$^1\text{H}$  NMR of 12b in  $\text{D}_2\text{O}$**

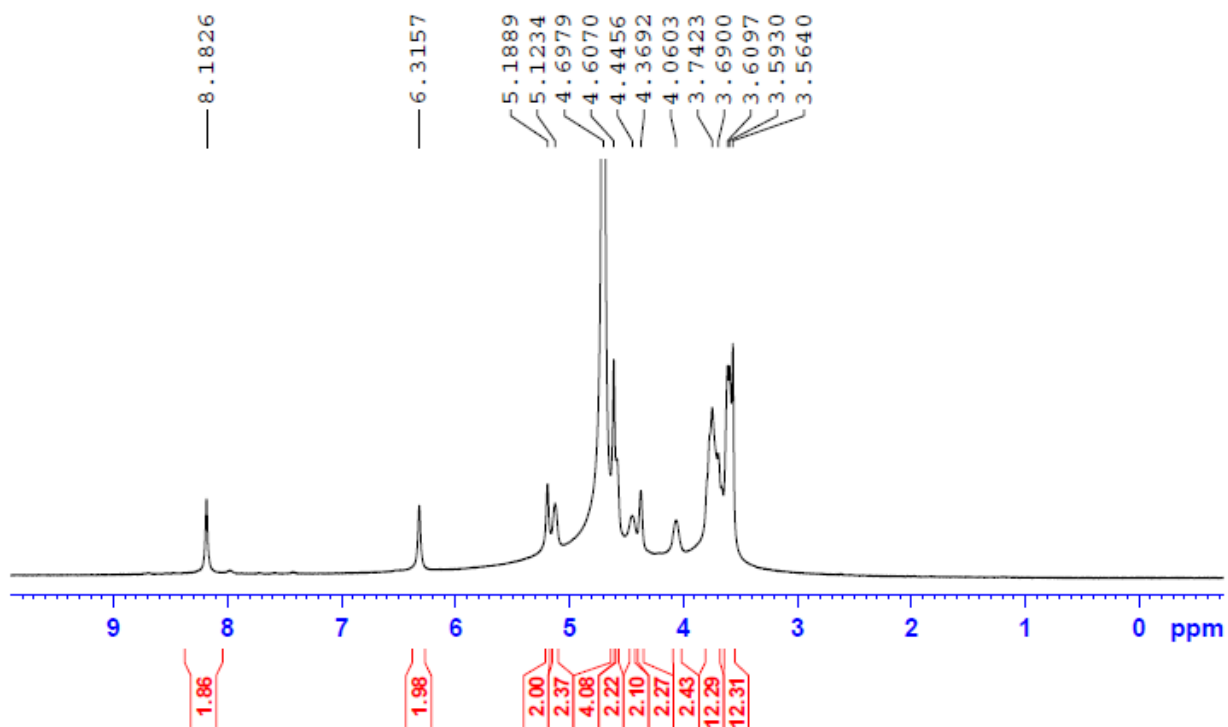

**$^{31}\text{P}$  NMR of 12b in  $\text{D}_2\text{O}$**

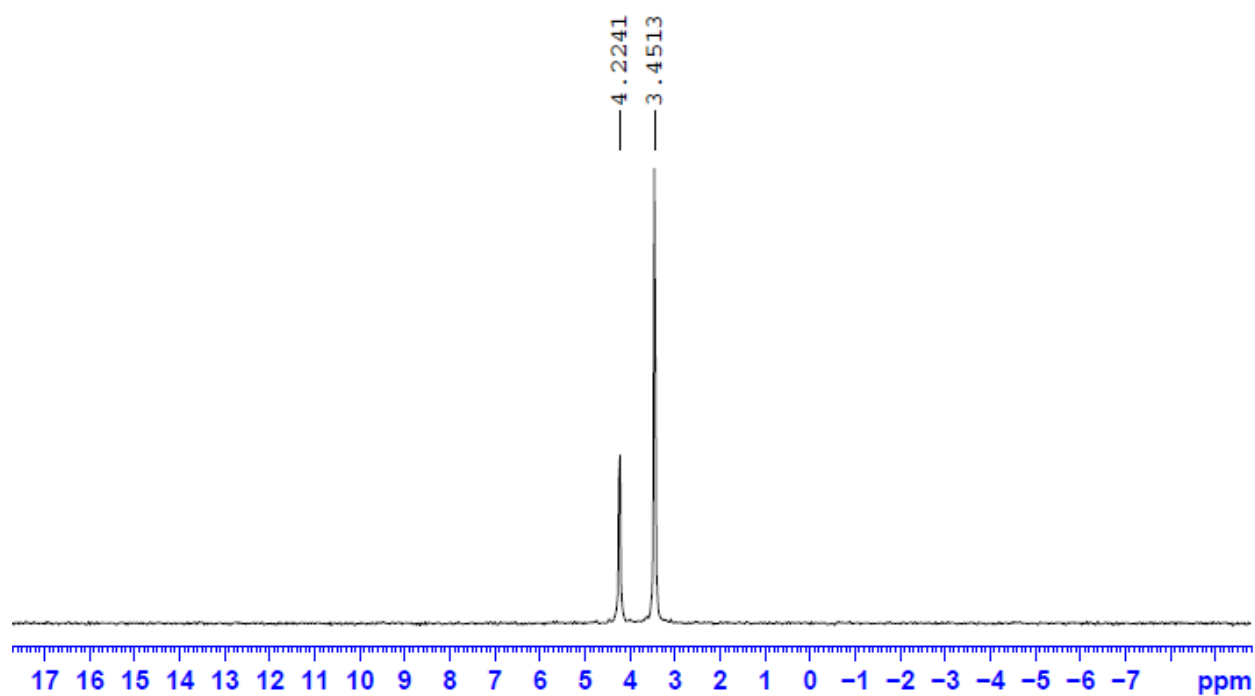

### COSY NMR of 12b in D<sub>2</sub>O

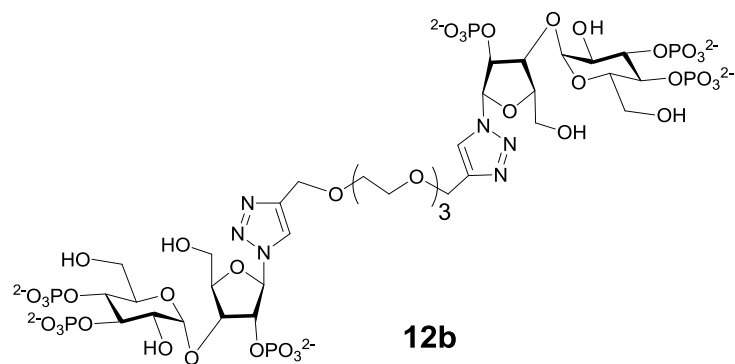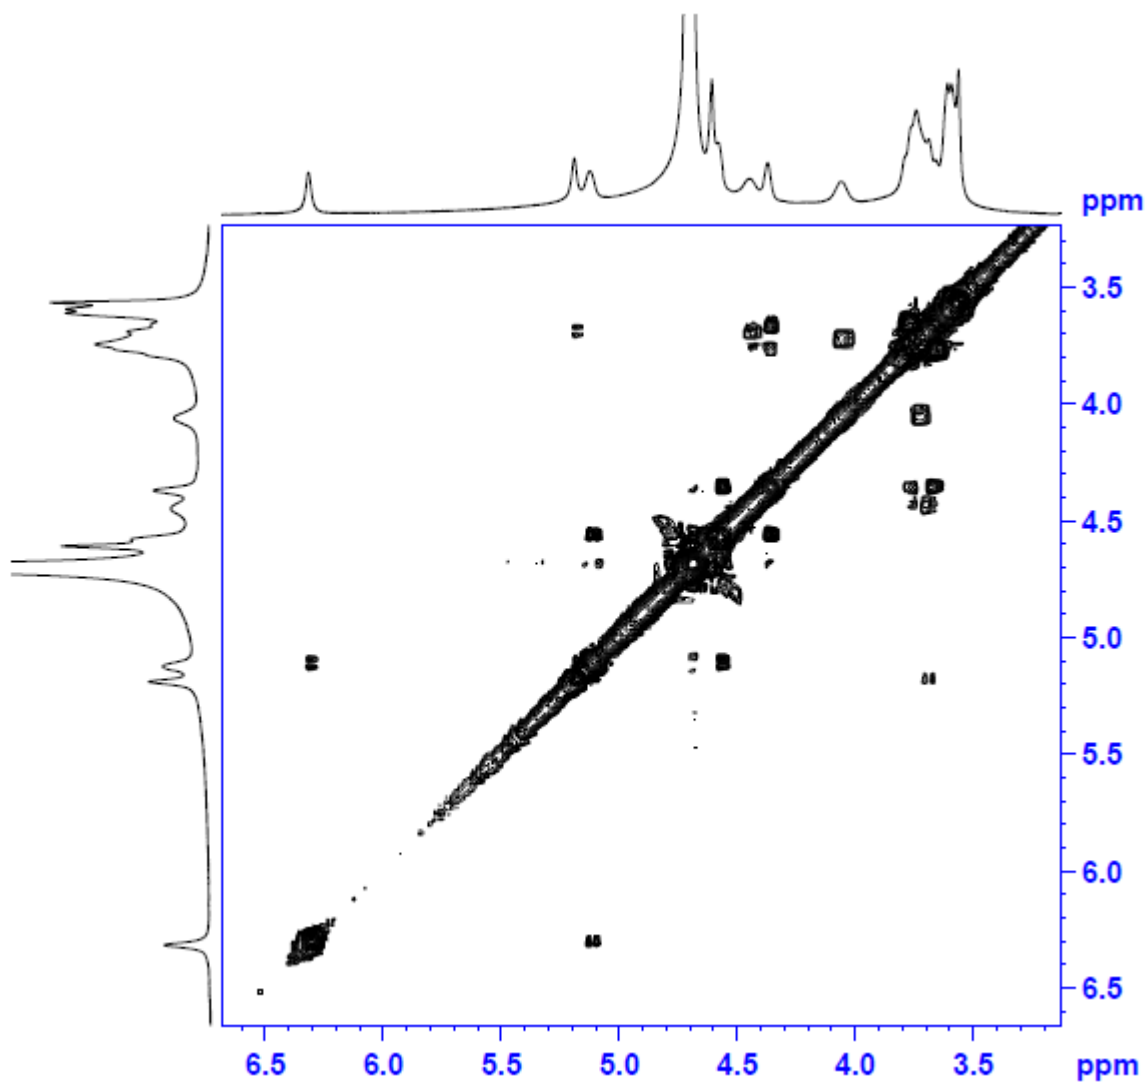



**$^{13}\text{C}$  NMR of 12b in  $\text{D}_2\text{O}$**

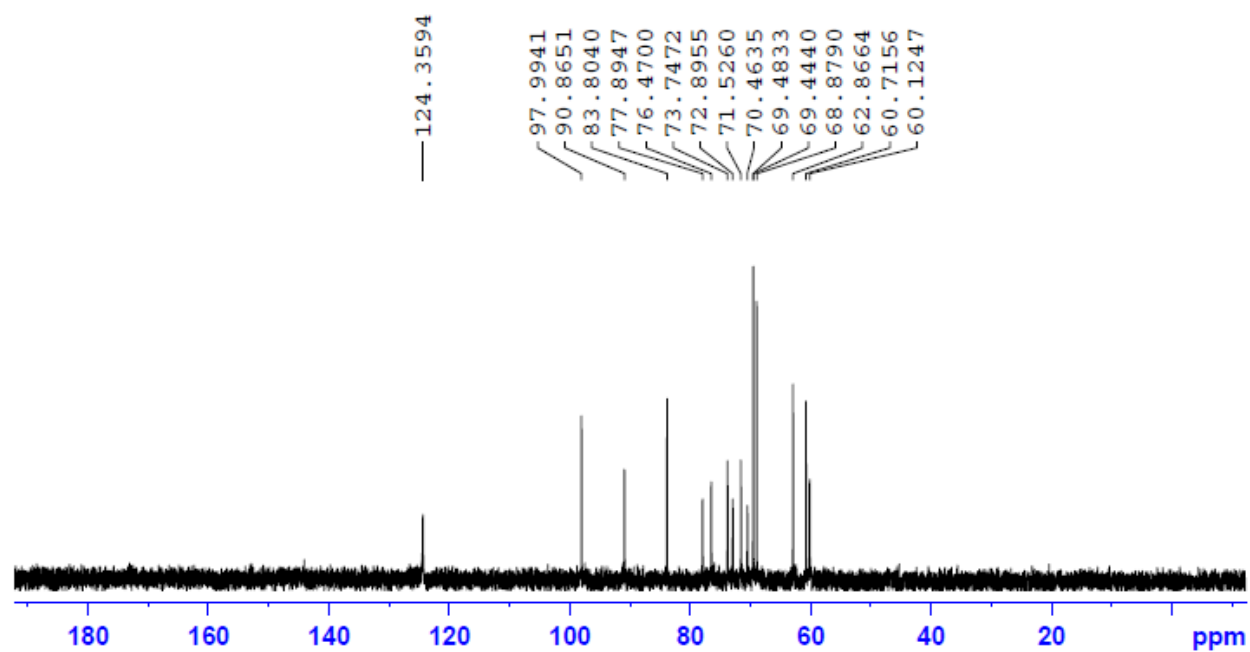

zoom

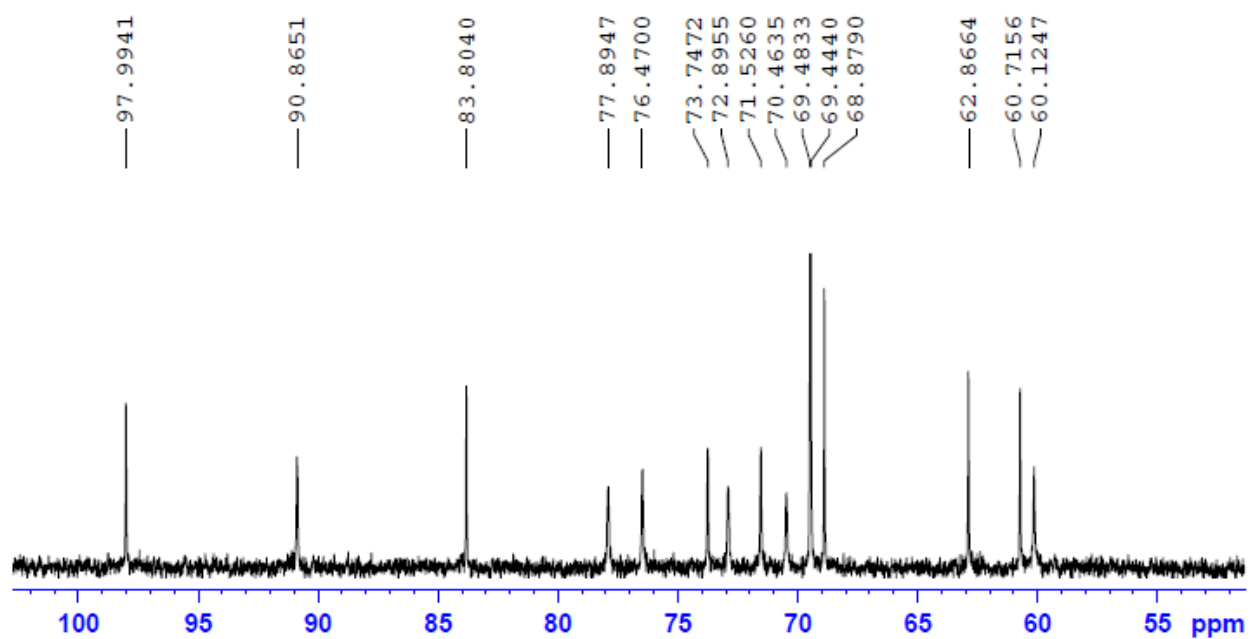

**DEPT NMR of 12b in D<sub>2</sub>O**

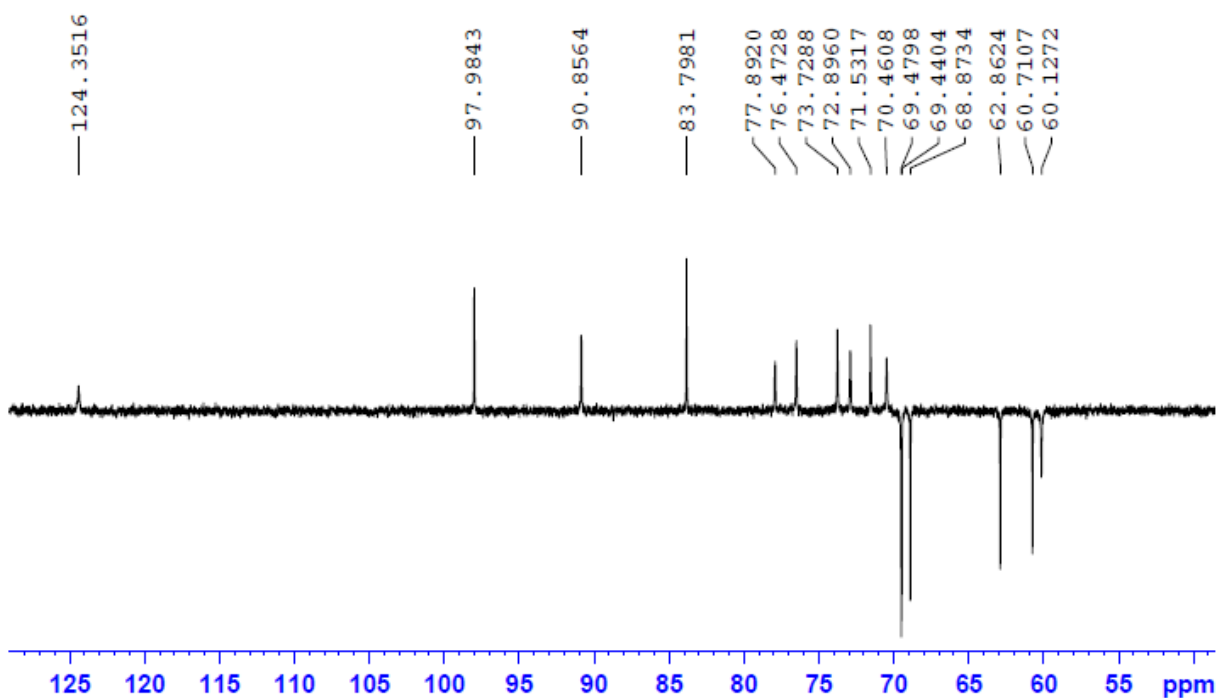

### HMQC NMR of 12b in D<sub>2</sub>O

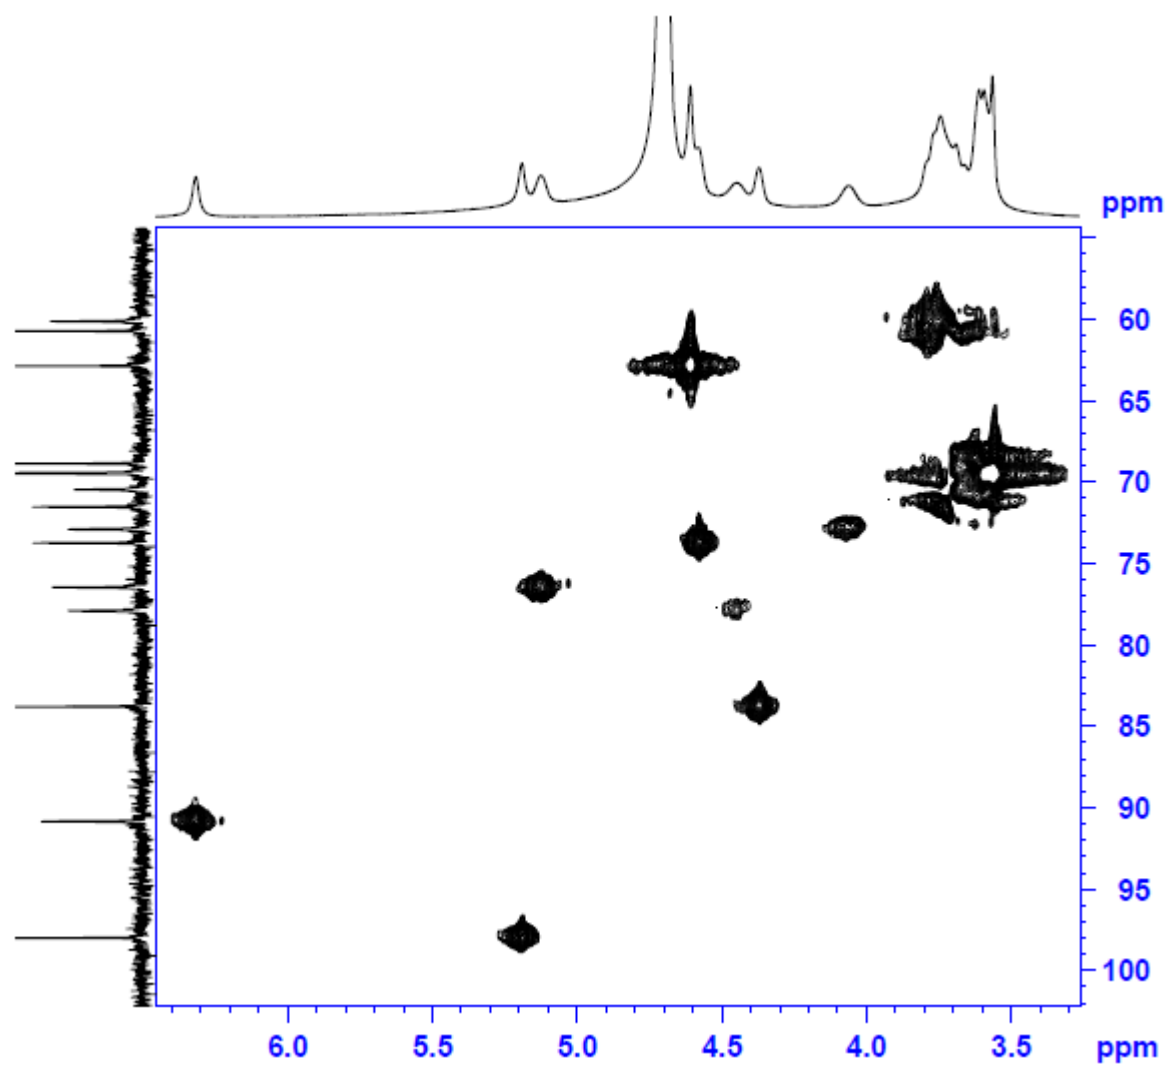

**$^1\text{H}$  NMR of 12c in  $\text{D}_2\text{O}$**

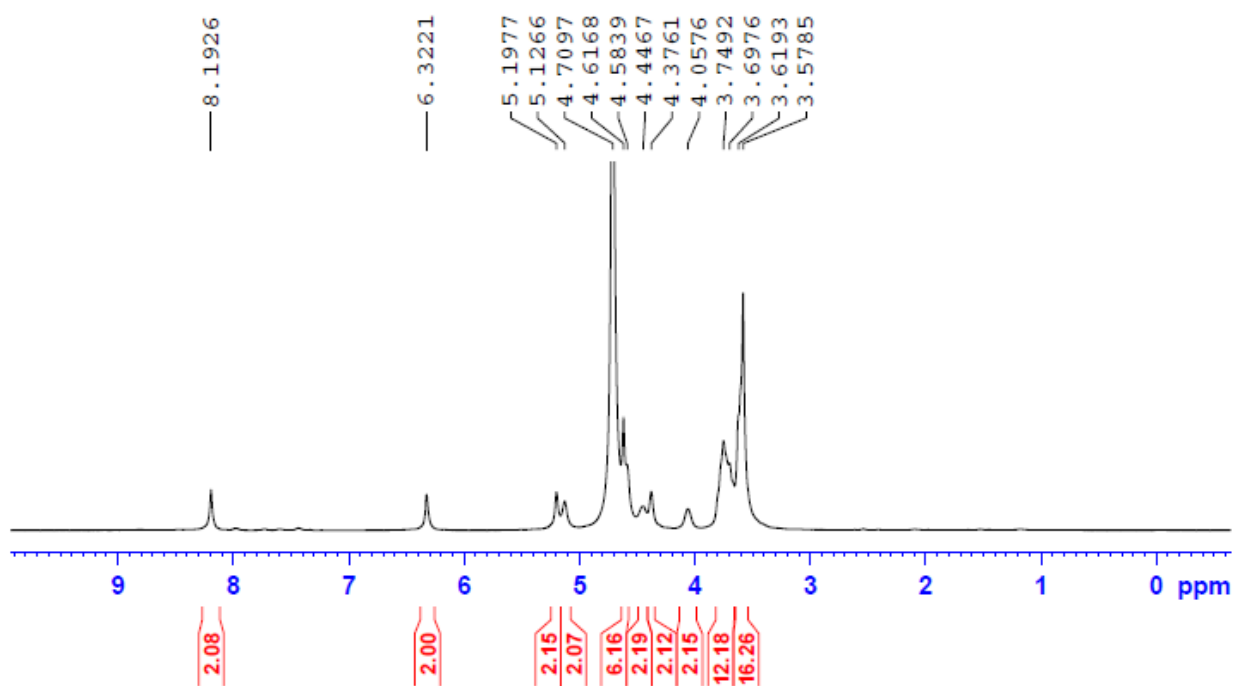

**$^{31}\text{P}$  NMR of 12c in  $\text{D}_2\text{O}$**

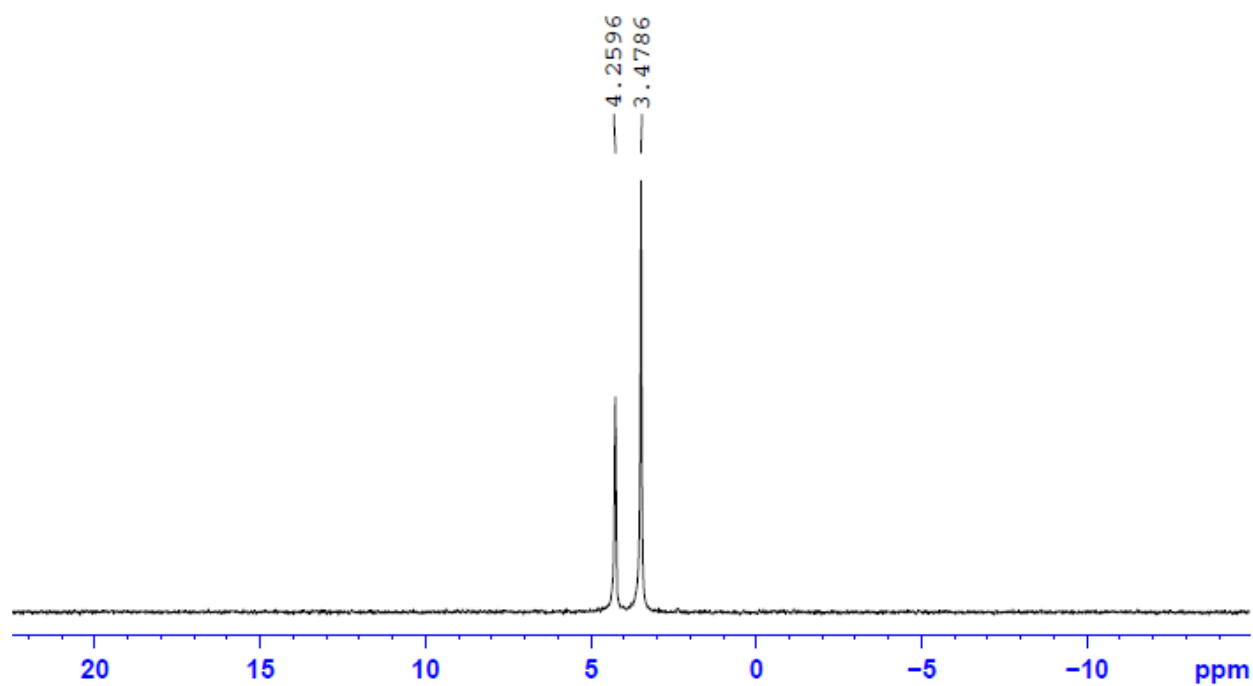

### COSY NMR of 12c in D<sub>2</sub>O

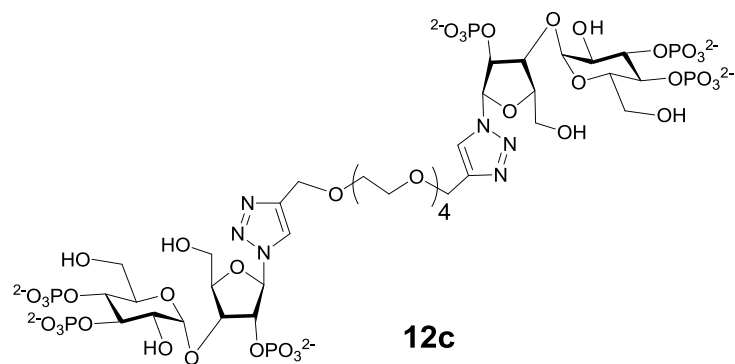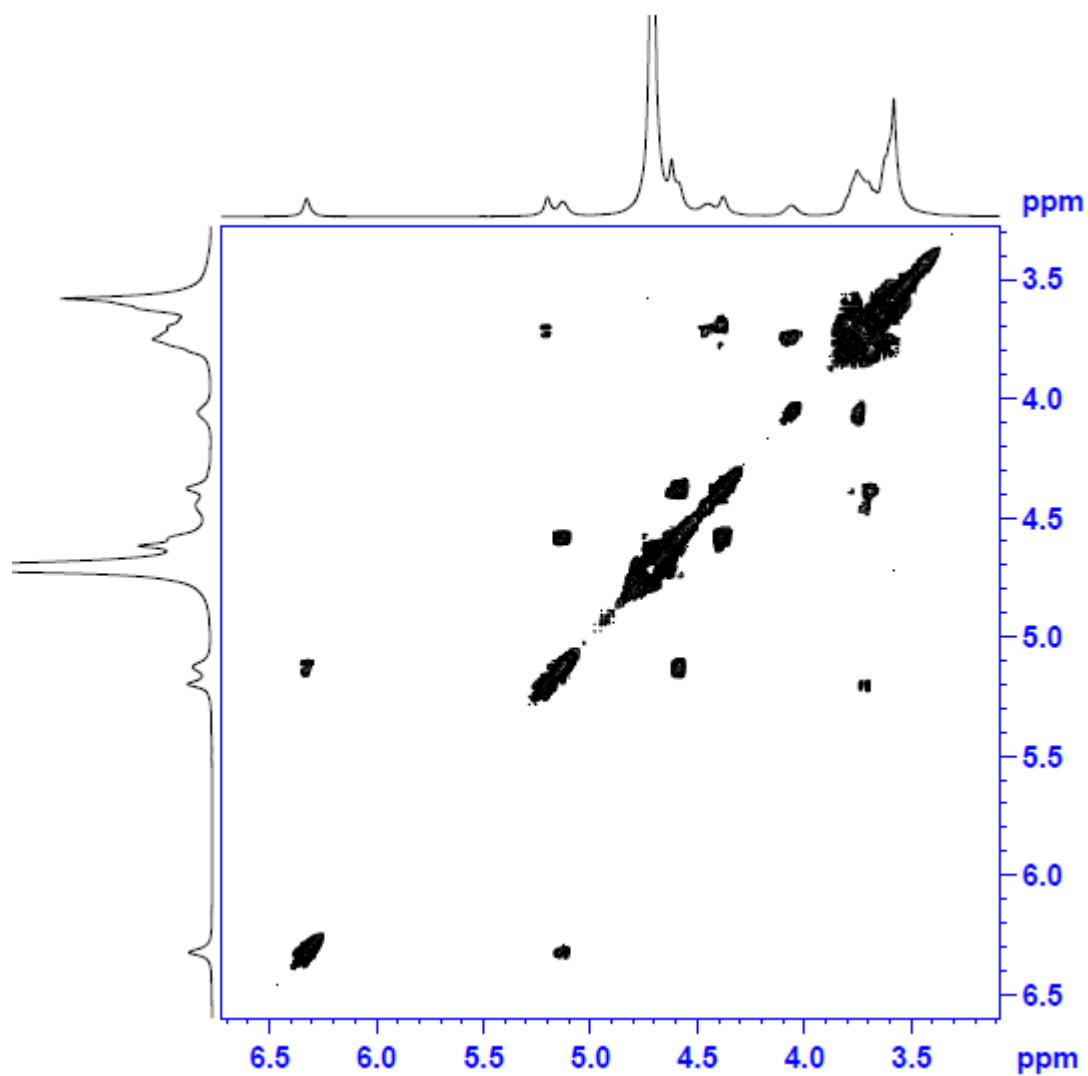

**$^{13}\text{C}$  NMR of 12c in  $\text{D}_2\text{O}$**

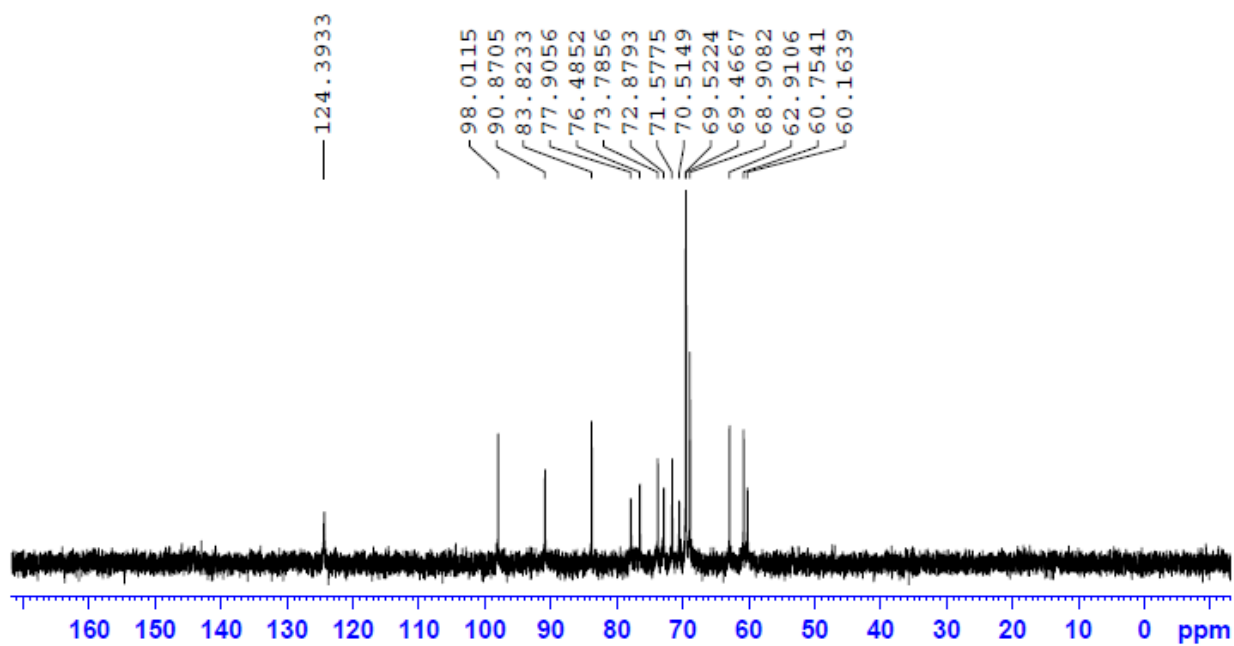

zoom

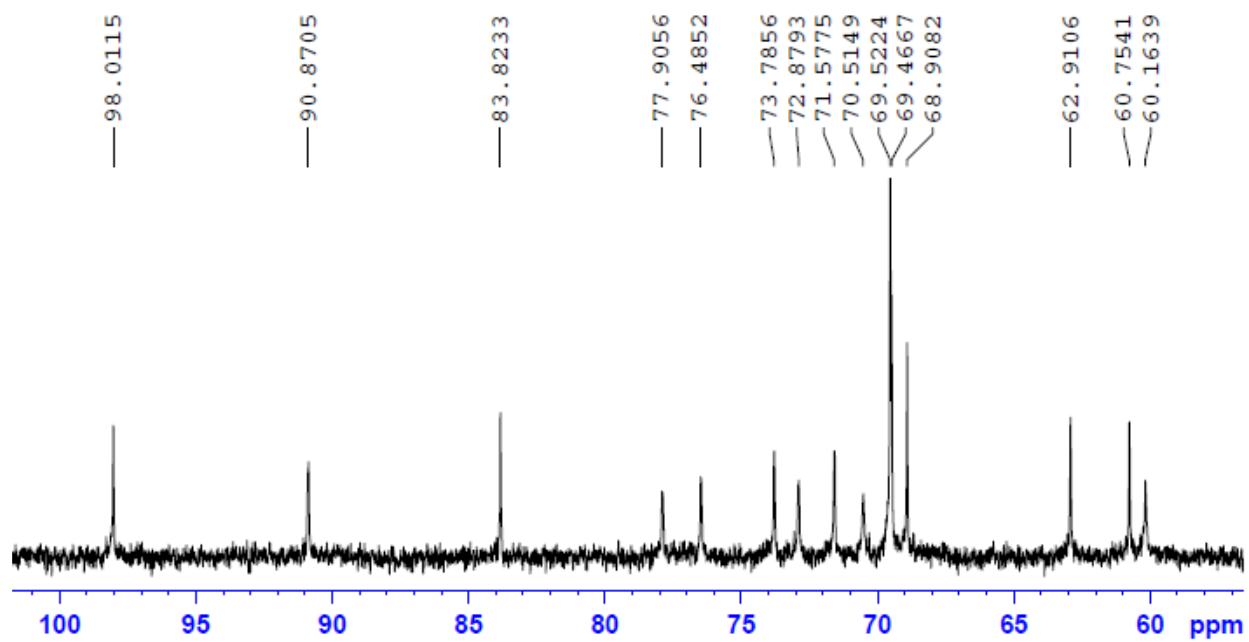

**DEPT NMR of 12c in D<sub>2</sub>O**

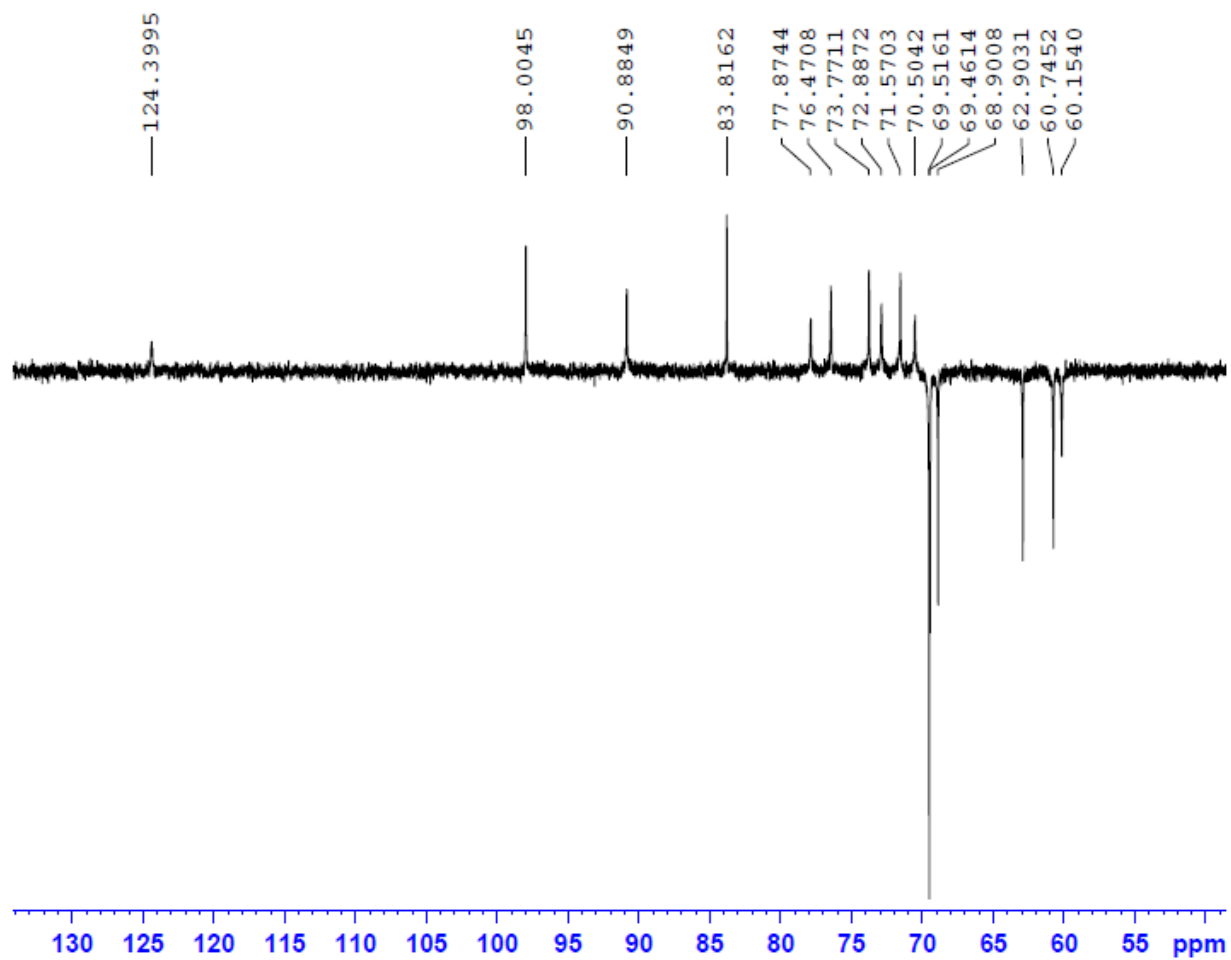

### HMQC NMR of 12c in D<sub>2</sub>O

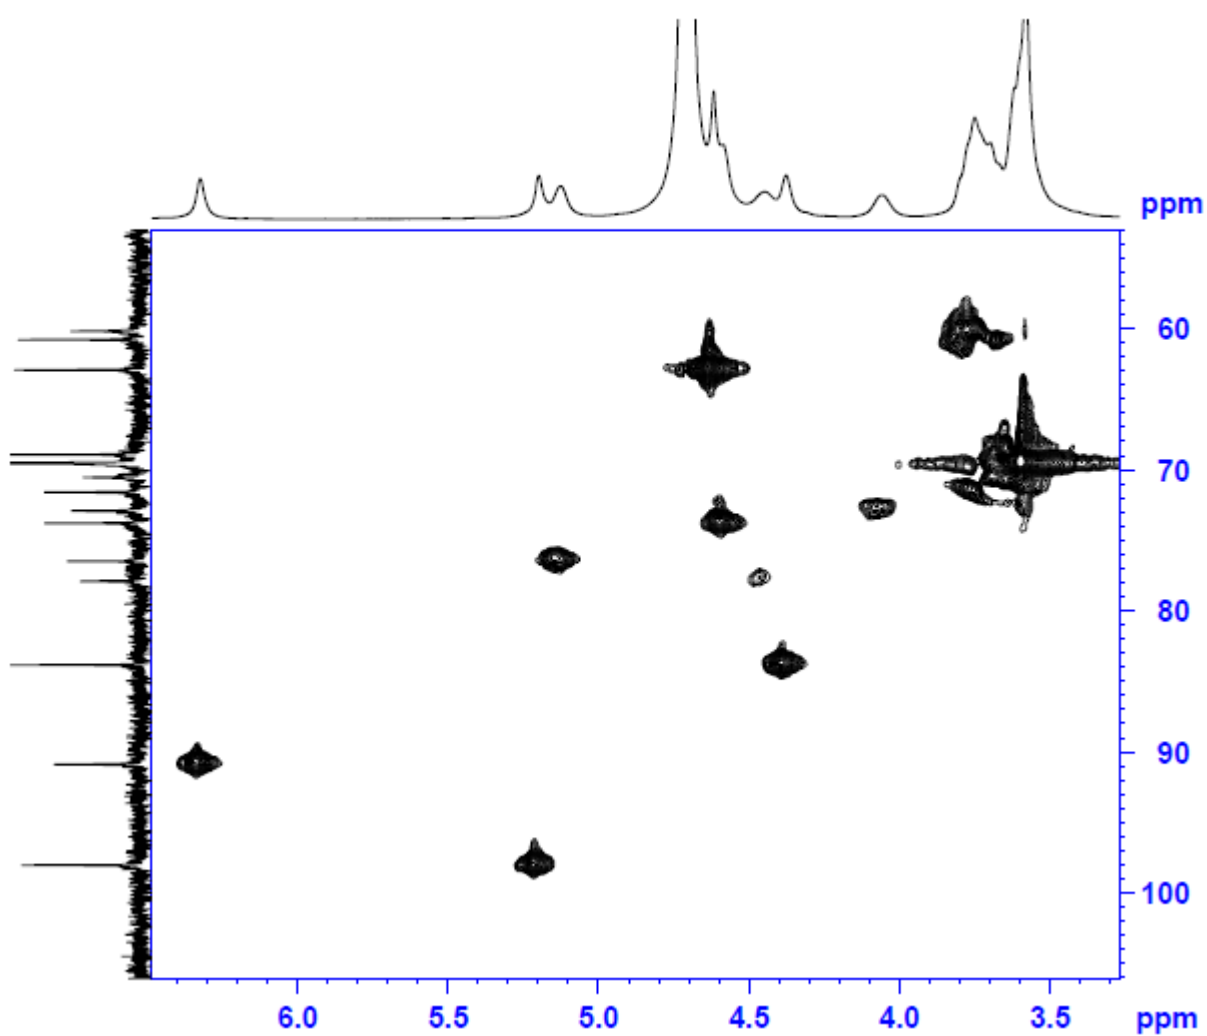



**$^1\text{H}$  NMR of 12d in  $\text{D}_2\text{O}$**

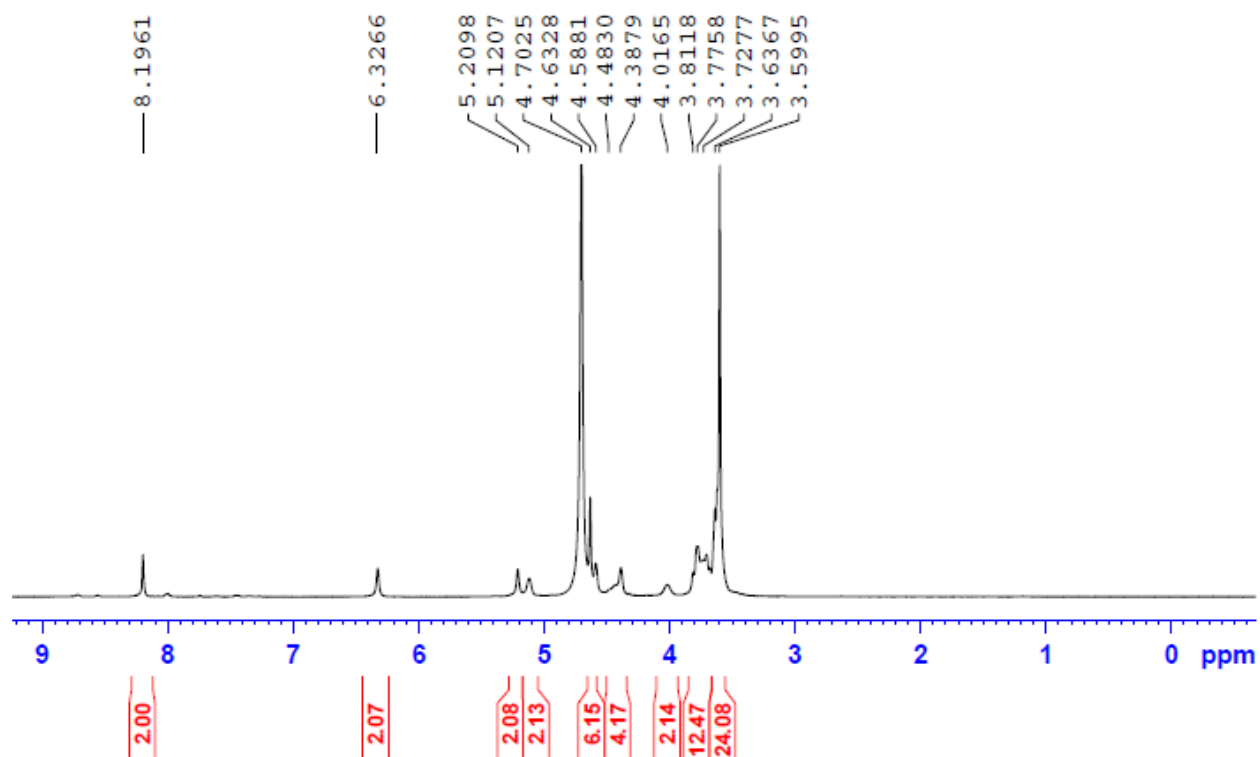

zoom

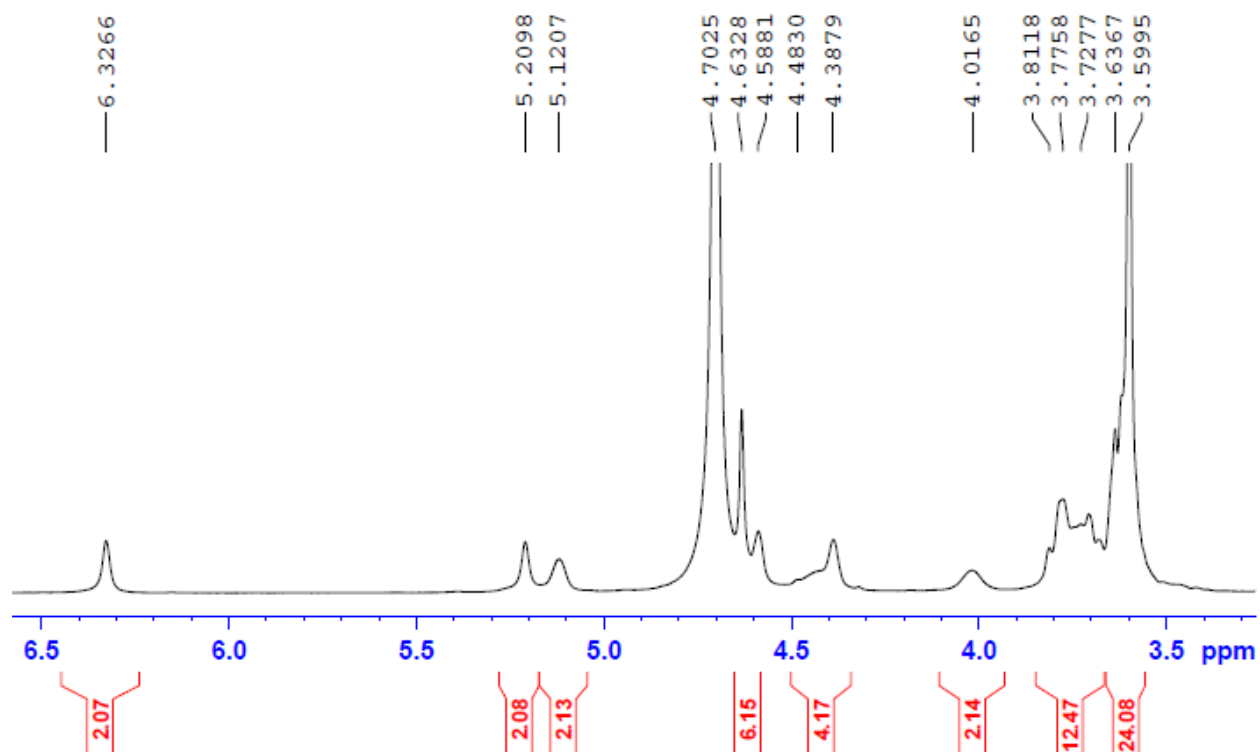

### COSY NMR of 12d in D<sub>2</sub>O

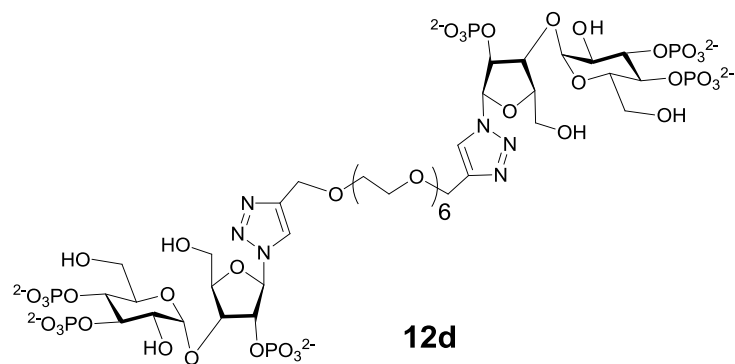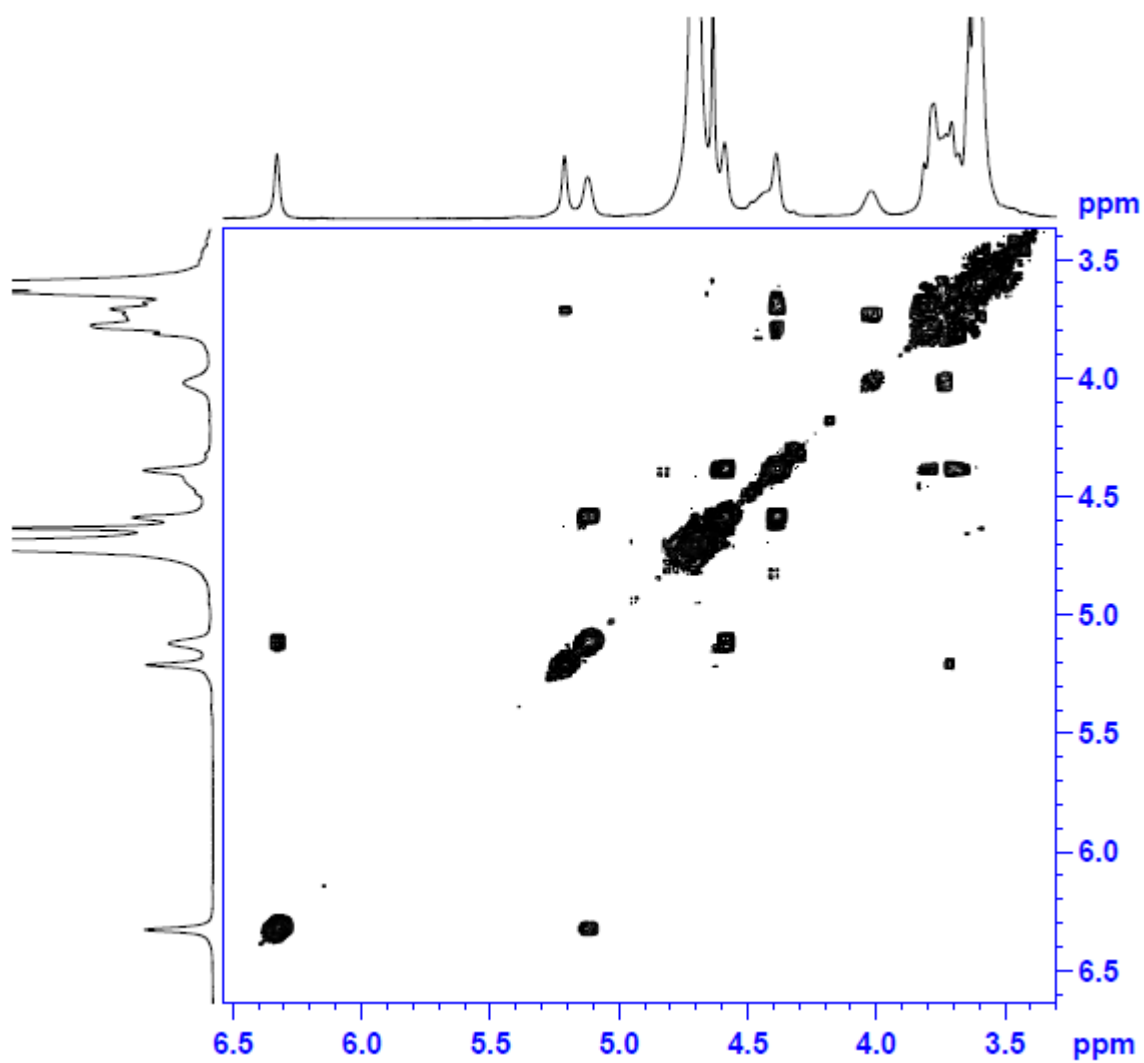

**$^{13}\text{C}$  NMR of 12d in  $\text{D}_2\text{O}$** 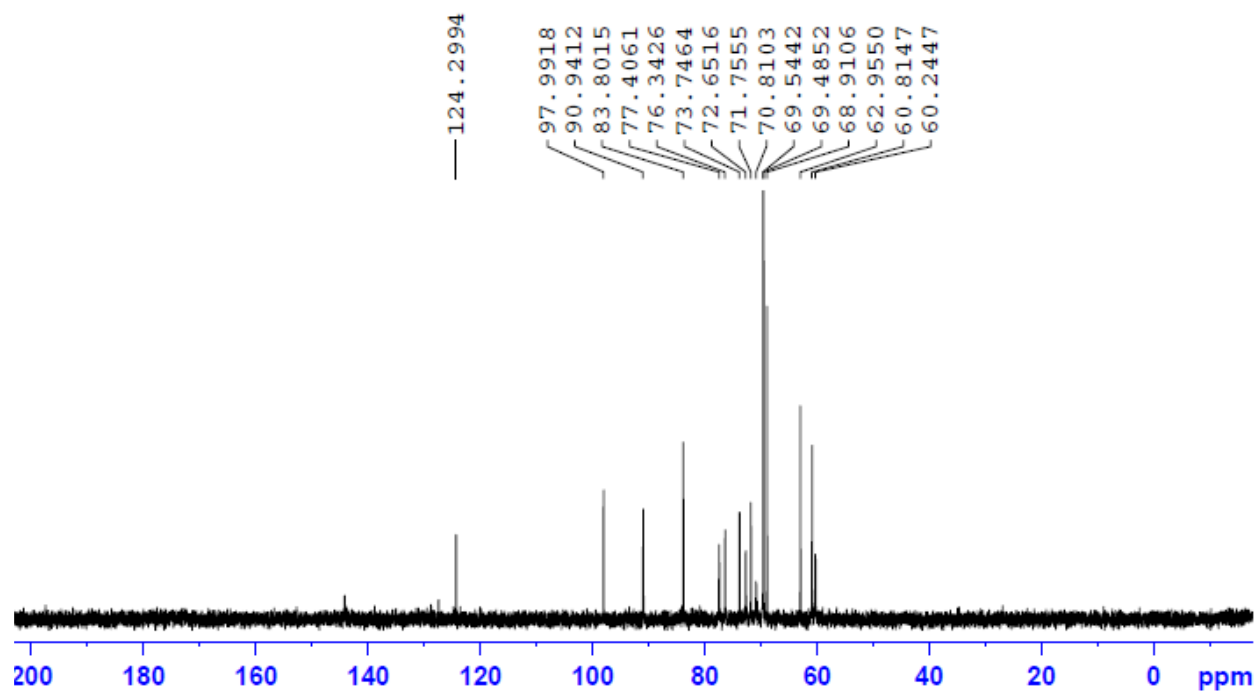

zoom

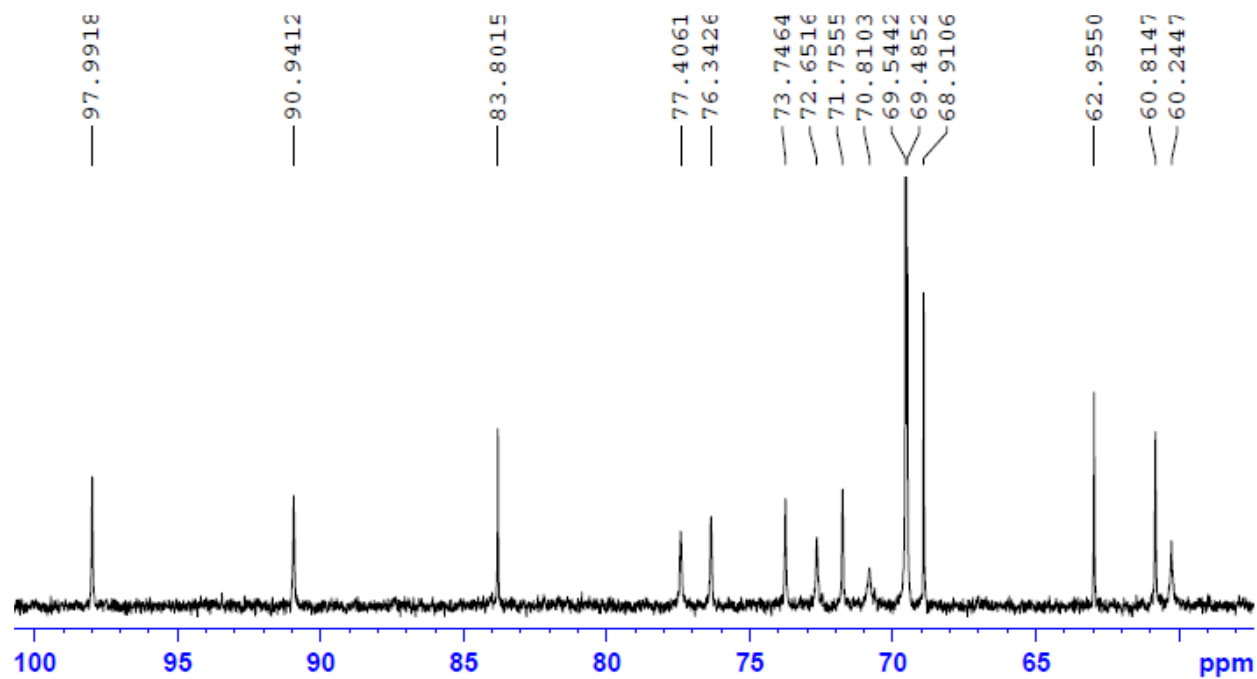

**DEPT NMR of 12d in D<sub>2</sub>O**

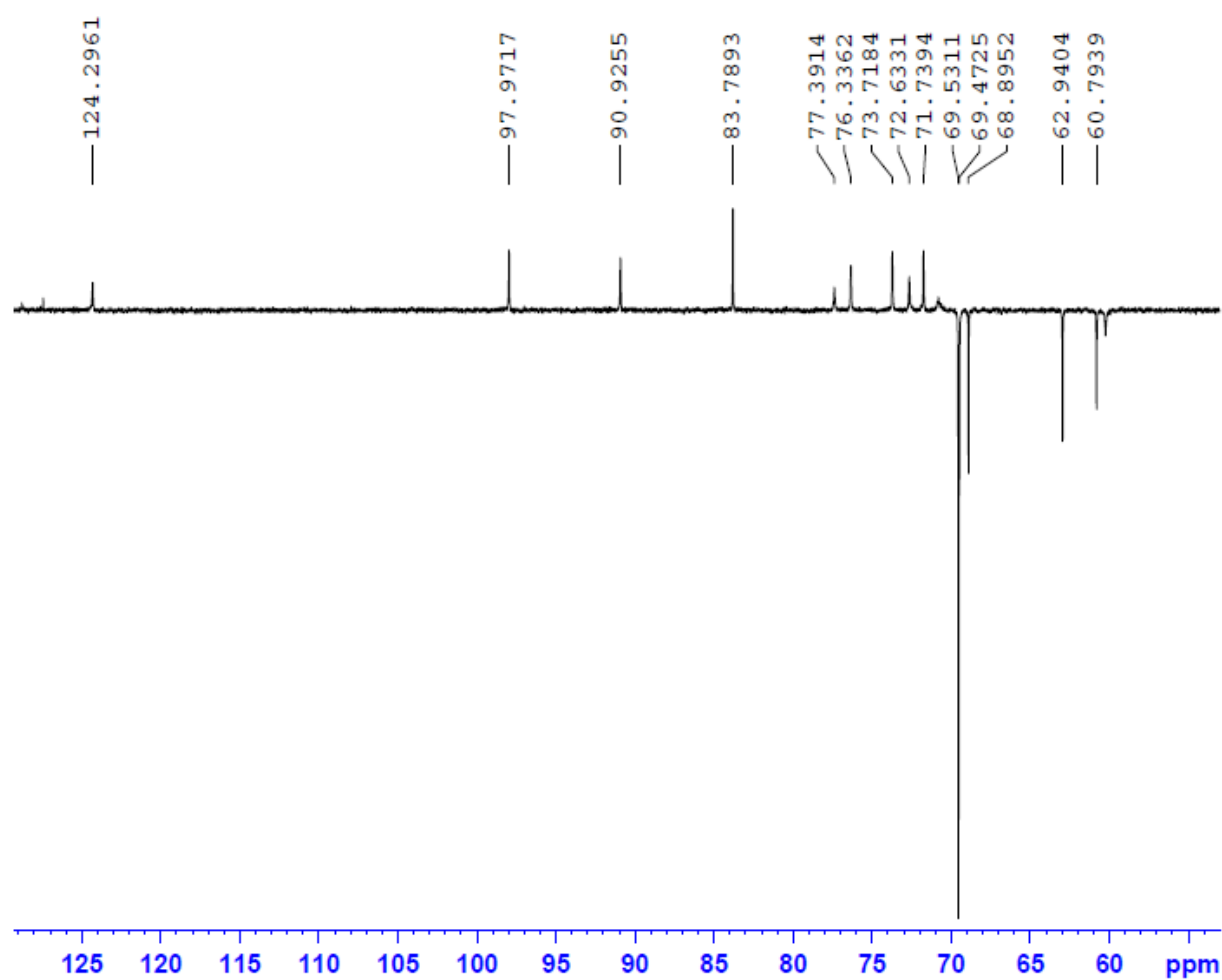

**$^{31}\text{P}$  NMR of 12d in  $\text{D}_2\text{O}$**

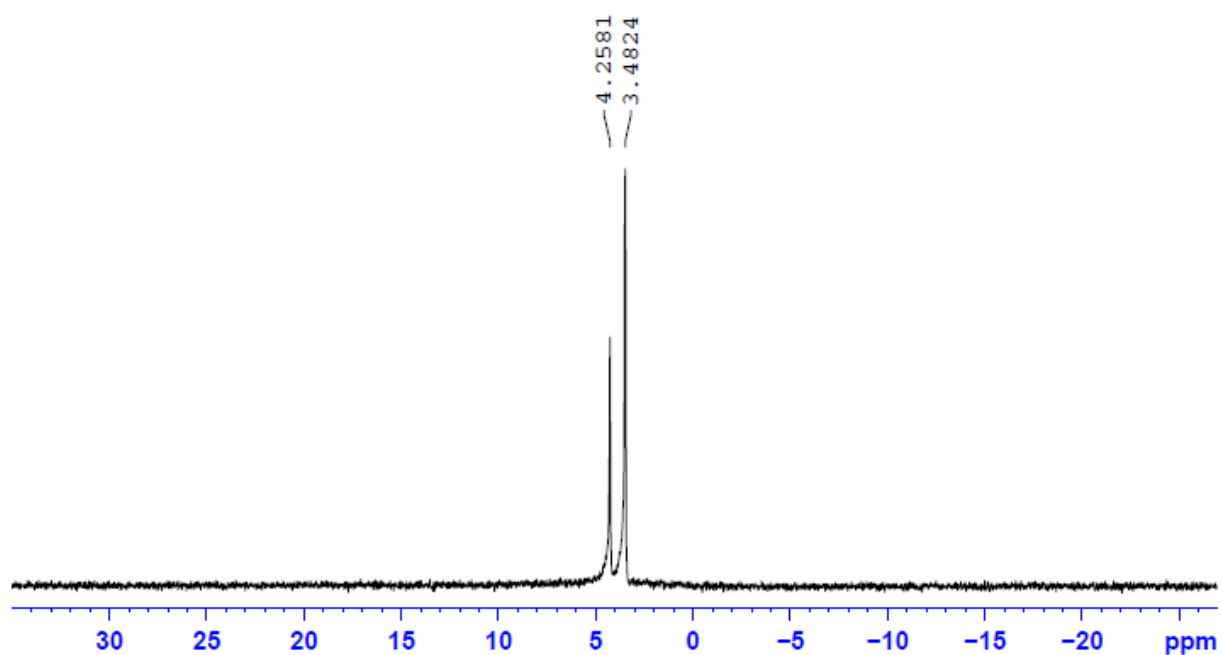

# HMQC NMR of 12d in D<sub>2</sub>O

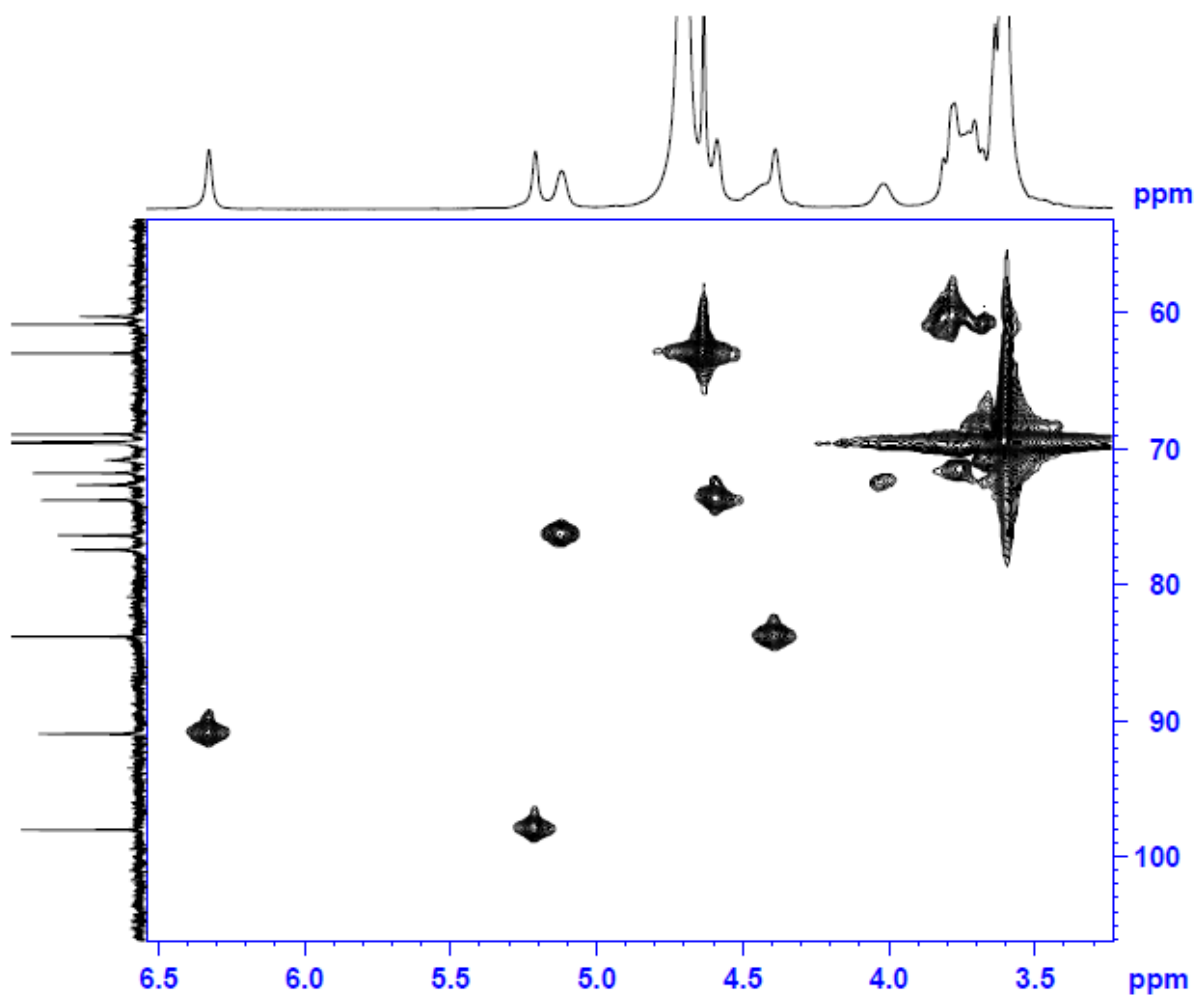

Supplement: c6ra19413c1.pdf [file c6ra19413c1.pdf]
